# Supplementary material for: A Graphical Alternating Conditional Expectation to Predict Hydrate Phase Equilibrium Conditions for Sweet and Sour Natural Gases
Source: Hindawi journal article supplement (doi:10.1155/2019/2383961), 2019-01-01
Supplement: f1 [file 2383961.f1.zip]

Archive with 21 entries (20 files):
- 2383961.f1/
- 2383961.f1/Fig10 Comparison of the experimental P with ACE test data for CO2 -CH4 system.xlsx
- 2383961.f1/Fig11 Comparison of the experimental P with calculated test data by ACE model for H2S-CO2-CH4 system.xlsx
- 2383961.f1/Fig2a Optimal transformation of variables as determined by ACE for (a) pressure.xlsx
- 2383961.f1/Fig2b Optimal transformation of variables as determined by ACE for (b) pressure in  the logarithmic space.xlsx
- 2383961.f1/Fig2c Optimal transformation of variables as determined by ACE for (c) gas gravity.xlsx
- 2383961.f1/Fig2d Optimal transformation of variables as determined by ACE for (d) temperature.xlsx
- 2383961.f1/Fig3 Optimal transformation of T versus the sum of the optimal transformation of P  ln(p) and γg.xlsx
- 2383961.f1/Fig4a Optimal transformation of variables as determined by ACE for (a) CH4.xlsx
- 2383961.f1/Fig4b Optimal transformation of variables as determined by ACE for(b) CO2.xlsx
- 2383961.f1/Fig4c Optimal transformation of variables as determined by ACE for(c) temperature.xlsx
- 2383961.f1/Fig4d Optimal transformation of variables as determined by ACE for(d) pressure.xlsx
- 2383961.f1/Fig5 Optimal transformation of P versus the sum of the optimal transformation of P  y(CO2)  y(CH4) for CO2-CH4 system.xlsx
- 2383961.f1/Fig6a Optimal transformation of variables as determined by ACE for (a) Ln(CH4).xlsx
- 2383961.f1/Fig6b Optimal transformation of variables as determined by ACE for(b) CO2 mole percent fraction.xlsx
- 2383961.f1/Fig6c Optimal transformation of variables as determined by ACE for(c) H2S mole percent fraction.xlsx
- 2383961.f1/Fig6d Optimal transformation of variables as determined by ACE for(d) temperature.xlsx
- 2383961.f1/Fig6e Optimal transformation of variables as determined by ACE for(e) pressure.xlsx
- 2383961.f1/Fig7 Optimal transformation of P versus the sum of the optimal transformation of independent variables for H2S-CO2-CH4 system.xlsx
- 2383961.f1/Fig8 Comparison of experimental data with ACE testing outputs.xlsx
- 2383961.f1/Fig9 Global AARD of different correlations.xlsx
