# Supplementary material for: A Graphical Alternating Conditional Expectation to Predict Hydrate Phase Equilibrium Conditions for Sweet and Sour Natural Gases
Source: Hindawi journal article supplement (doi:10.1155/2019/2383961), 2019-01-01
Supplement: f1 [file 2383961.f1.zip › 2383961.f1/Fig2a Optimal transformation of variables as determined by ACE for (a) pressure.xlsx]

## Sheet: Fig2a
P(kPa)	ϕ1(P)
2850.88	0.00967751
2923.98	0.00908017
2997.08	0.0084668
2997.08	0.0084668
3143.27	0.00757149
3216.37	0.00728709
3289.47	0.00692366
3362.57	0.00664307
3435.67	0.00630239
3508.77	0.00599611
3581.87	0.00563586
3581.87	0.00563586
3728.07	0.00460501
3801.17	0.00413261
3874.27	0.00364854
3947.37	0.00313994
4020.47	0.00272261
4166.67	0.0018258
4312.87	0.000925652
4459.06	5.43058e-05
4532.16	-0.00039502
4678.36	-0.00117682
4897.66	-0.0023961
5043.86	-0.00310308
5190.06	-0.00377252
5336.26	-0.004448
5482.46	-0.00509571
5555.56	-0.00545793
5555.56	-0.00545793
5628.65	-0.00580676
5701.75	-0.00614593
5921.05	-0.00726536
6140.35	-0.00834747
6213.45	-0.00867434
5994.15	-0.0076324
6286.55	-0.00901512
6359.65	-0.00932275
6432.75	-0.00962564
6578.95	-0.0102069
6725.15	-0.0107261
7017.54	-0.011706
7163.74	-0.0122888
7236.84	-0.0125078
7456.14	-0.0133366
7602.34	-0.0139099
7748.54	-0.0144636
8040.94	-0.0155191
8333.33	-0.016372
8479.53	-0.0167374
8698.83	-0.0172098
8918.13	-0.0176262
9210.53	-0.0181341
9502.92	-0.0186911
9868.42	-0.0193005
10380.1	-0.0202348
10453.2	-0.0203628
10891.8	-0.021138
11111.1	-0.021497
11549.7	-0.0222718
11622.8	-0.0224065
11695.9	-0.0225425
12207.6	-0.023494
12573.1	-0.0241759
12865.5	-0.0247383
13596.5	-0.0261119
14108.2	-0.0270604
14619.9	-0.0280133
15058.5	-0.0288204
15424	-0.0294962
16008.8	-0.0305633
16666.7	-0.0317554
17105.3	-0.032545
17836.3	-0.0338549
18640.4	-0.0352845
19371.3	-0.0365776
20102.3	-0.03787
20760.2	-0.0390333
21710.5	-0.0407135
1242.69	0.0215152
1242.69	0.0215152
1242.69	0.0215152
1242.69	0.0215152
1242.69	0.0215152
1315.79	0.0209194
1315.79	0.0209194
1388.89	0.0203171
1461.99	0.0197078
1535.09	0.0189563
1535.09	0.0189563
1608.19	0.0184144
1608.19	0.0184144
1827.49	0.0171602
1754.39	0.0174972
1827.49	0.0171602
1900.58	0.0165364
1973.68	0.0160589
1973.68	0.0160589
2046.78	0.0154511
2119.88	0.0149144
2192.98	0.0144746
2266.08	0.013881
2339.18	0.0134598
2339.18	0.0134598
2485.38	0.0124292
2558.48	0.011856
2631.58	0.0113333
2704.68	0.0107846
2777.78	0.0102206
2923.98	0.00908017
2997.08	0.0084668
2997.08	0.0084668
3070.18	0.0080383
3216.37	0.00728709
3289.47	0.00692366
3435.67	0.00630239
3508.77	0.00599611
3508.77	0.00599611
3654.97	0.00514651
3728.07	0.00460501
3947.37	0.00313994
3947.37	0.00313994
4093.57	0.00230914
4166.67	0.0018258
4239.77	0.00138966
4385.96	0.000514383
4605.26	-0.00079559
4751.46	-0.00159508
4897.66	-0.0023961
5043.86	-0.00310308
5190.06	-0.00377252
5263.16	-0.00411317
5409.36	-0.00476349
5628.65	-0.00580676
5701.75	-0.00614593
5921.05	-0.00726536
6067.25	-0.00800662
6359.65	-0.00932275
6505.85	-0.0099199
6798.25	-0.010946
7017.54	-0.011706
7309.94	-0.0127829
7748.54	-0.0144636
7967.84	-0.0152424
8260.23	-0.016174
8406.43	-0.0165593
8552.63	-0.0169197
8698.83	-0.0172098
8918.13	-0.0176262
9064.33	-0.0178754
9283.63	-0.018266
9502.92	-0.0186911
9868.42	-0.0193005
10526.3	-0.0204928
11038	-0.0213852
11403.5	-0.0220087
11769	-0.022679
12426.9	-0.0239044
13231	-0.0254265
13888.9	-0.0266556
14400.6	-0.0276044
14693	-0.0281479
15350.9	-0.0293621
16155	-0.0308288
16593.6	-0.0316234
804.09	0.0252848
804.09	0.0252848
804.09	0.0252848
804.09	0.0252848
877.19	0.0244595
877.19	0.0244595
877.19	0.0244595
950.29	0.0238171
950.29	0.0238171
950.29	0.0238171
1023.39	0.0232713
1023.39	0.0232713
1023.39	0.0232713
1023.39	0.0232713
1096.49	0.0227064
1096.49	0.0227064
1096.49	0.0227064
1169.59	0.0221218
1242.69	0.0215152
1242.69	0.0215152
1242.69	0.0215152
1315.79	0.0209194
1315.79	0.0209194
1388.89	0.0203171
1388.89	0.0203171
1388.89	0.0203171
1461.99	0.0197078
1535.09	0.0189563
1461.99	0.0197078
1535.09	0.0189563
1608.19	0.0184144
1608.19	0.0184144
1608.19	0.0184144
1681.29	0.0180233
1681.29	0.0180233
1754.39	0.0174972
1754.39	0.0174972
1827.49	0.0171602
1900.58	0.0165364
1973.68	0.0160589
2046.78	0.0154511
2192.98	0.0144746
2192.98	0.0144746
2266.08	0.013881
2412.28	0.0129797
2485.38	0.0124292
2631.58	0.0113333
2704.68	0.0107846
2850.88	0.00967751
3070.18	0.0080383
3216.37	0.00728709
3289.47	0.00692366
3508.77	0.00599611
3654.97	0.00514651
3801.17	0.00413261
4020.47	0.00272261
4239.77	0.00138966
4532.16	-0.00039502
4751.46	-0.00159508
5043.86	-0.00310308
5409.36	-0.00476349
5774.85	-0.00651371
5994.15	-0.0076324
6213.45	-0.00867434
6578.95	-0.0102069
6944.44	-0.0114413
7529.24	-0.0136259
7894.74	-0.0150062
8114.04	-0.0157429
8479.53	-0.0167374
8918.13	-0.0176262
9502.92	-0.0186911
9795.32	-0.0191864
10160.8	-0.0198458
10526.3	-0.0204928
11111.1	-0.021497
11330.4	-0.021881
11622.8	-0.0224065
12207.6	-0.023494
12573.1	-0.0241759
586.51	0.0282467
586.51	0.0282467
586.51	0.0282467
659.82	0.0271684
659.82	0.0271684
659.82	0.0271684
659.82	0.0271684
733.14	0.0261811
659.82	0.0271684
733.14	0.0261811
733.14	0.0261811
806.45	0.0252536
806.45	0.0252536
806.45	0.0252536
879.77	0.0244528
879.77	0.0244528
879.77	0.0244528
953.08	0.0237921
1026.39	0.0232767
1026.39	0.0232767
1026.39	0.0232767
1026.39	0.0232767
1026.39	0.0232767
1099.71	0.0226911
1173.02	0.0220868
1173.02	0.0220868
1173.02	0.0220868
1173.02	0.0220868
1246.33	0.0214828
1246.33	0.0214828
1319.65	0.0208857
1319.65	0.0208857
1392.96	0.0202889
1392.96	0.0202889
1466.28	0.0196323
1466.28	0.0196323
1539.59	0.0189827
1539.59	0.0189827
1612.9	0.0183956
1686.22	0.0179485
1686.22	0.0179485
1759.53	0.0174792
1832.84	0.0171179
1906.16	0.0164924
1979.47	0.0160557
2052.79	0.0153619
2126.1	0.0148885
2199.41	0.0143902
2199.41	0.0143902
2346.04	0.0134184
2492.67	0.0123808
2565.98	0.0117864
2859.24	0.00960226
3005.87	0.00845632
3152.49	0.00755626
3299.12	0.00681081
3519.06	0.00598668
3592.38	0.00559752
3739	0.00453663
3885.63	0.00357082
4105.57	0.00223456
4325.51	0.000851256
4545.45	-0.00045082
4838.71	-0.00207974
5058.65	-0.00317384
5278.59	-0.00418747
5571.85	-0.00555463
5865.1	-0.00697791
6378.3	-0.00939531
6671.55	-0.0105431
7111.44	-0.0120815
7331.38	-0.0128487
7624.63	-0.0139915
7917.89	-0.0150762
8431.09	-0.0166204
8724.34	-0.0172682
9090.91	-0.0179239
9384.16	-0.018448
9824.05	-0.0192267
10337.2	-0.0201592
10997.1	-0.0213187
11656.9	-0.0224691
12023.5	-0.0231517
12390	-0.0238385
12829.9	-0.024666
13636.4	-0.0261871
14736.1	-0.028227
15762.5	-0.0301146
16495.6	-0.0314461
17448.7	-0.033162
18181.8	-0.0344703
18695	-0.0353815
582.63	0.0283072
581.96	0.0283177
581.43	0.028326
654.47	0.0272433
580.62	0.0283386
653.4	0.0272574
652.73	0.0272632
724.98	0.0262877
724.04	0.0262998
723.64	0.0263062
723.1	0.0263128
722.57	0.026318
795.21	0.025397
794.68	0.0254034
793.61	0.0254145
865.99	0.024564
938.23	0.0239157
937.43	0.0239156
937.03	0.0239184
936.49	0.0239201
1009.27	0.023377
1008.73	0.0233895
1008.2	0.0234034
1080.84	0.0228351
1152.95	0.0222637
1152.15	0.0222641
1224.8	0.0216598
1223.99	0.0216665
1296.64	0.0210779
1296.24	0.0210794
1295.57	0.0210837
1368.48	0.0204814
1367.54	0.0204895
1513.23	0.0191566
1585.75	0.0186028
1584.67	0.0186125
1657.45	0.0181378
1730.1	0.0176513
1802.48	0.0172728
1874.72	0.0167765
1947.1	0.0161997
2019.34	0.0156978
2091.98	0.015086
2237.27	0.0141004
2382.3	0.0131878
2673.54	0.0110126
2746.06	0.0104573
2965.46	0.0087054
3038.11	0.00824234
3256.71	0.00711509
3402.54	0.00647488
3548.63	0.00581591
3694.32	0.00485409
3986.77	0.00291114
4132.73	0.00203063
4351.87	0.000717357
4644.05	-0.00099108
4936.37	-0.00259826
5155.24	-0.00361223
5301.6	-0.00430137
5740.01	-0.00633785
6032.47	-0.00782034
6324.92	-0.00918462
6690.69	-0.010615
7056.45	-0.0118665
7202.68	-0.0124027
7641.62	-0.0140519
8080.7	-0.0156479
8519.52	-0.0168402
8885.68	-0.017564
9397.94	-0.0184895
9837.16	-0.019244
10276.4	-0.0200515
10935.1	-0.0212136
11301.3	-0.0218278
11887	-0.0228963
12472.7	-0.0239859
13131.9	-0.025241
13937.4	-0.026745
14450	-0.027696
15182.4	-0.0290491
16207.7	-0.0309244
17013.3	-0.0323796
367.65	0.0316645
367.65	0.0316645
367.65	0.0316645
441.18	0.0305162
441.18	0.0305162
441.18	0.0305162
514.71	0.0293679
514.71	0.0293679
588.24	0.0282172
588.24	0.0282172
588.24	0.0282172
588.24	0.0282172
661.77	0.0271412
661.77	0.0271412
661.77	0.0271412
735.29	0.0261524
735.29	0.0261524
735.29	0.0261524
808.82	0.0252243
808.82	0.0252243
882.35	0.0244275
955.88	0.0237691
955.88	0.0237691
1029.41	0.0232741
1102.94	0.0226739
1102.94	0.0226739
1176.47	0.0220405
1323.53	0.0208518
1397.06	0.0202542
1470.59	0.0195889
1617.65	0.0183539
1691.18	0.0178519
1764.71	0.0174664
1911.76	0.016468
1985.29	0.0159907
2132.35	0.0148657
2352.94	0.0133863
2426.47	0.0128906
2573.53	0.0117424
2720.59	0.0106637
2867.65	0.00953301
2941.18	0.00891771
3161.76	0.00753748
3235.29	0.00721698
3382.35	0.00656422
3455.88	0.00621472
3750	0.00447068
3897.06	0.0034831
4338.24	0.000786757
4632.35	-0.00094545
5000	-0.00290707
5220.59	-0.00391483
5661.76	-0.00595598
6102.94	-0.00817122
6397.06	-0.00947524
6911.76	-0.0113253
7794.12	-0.0146321
8014.71	-0.0154118
8602.94	-0.0170204
9558.82	-0.0188079
10147.1	-0.0198197
10735.3	-0.0208697
11323.5	-0.0218696
12205.9	-0.0234935
13529.4	-0.0259859
14485.3	-0.0277624
16397.1	-0.0312677
17500	-0.0332542
18529.4	-0.0350878
18970.6	-0.0358691
20000	-0.0376892
20661.8	-0.0388593
21250	-0.0398993
2891.3	0.00934838
4468.37	-7.3528e-06
5519.74	-0.00527815
6483.51	-0.00983046
7359.66	-0.0129521
8586.28	-0.0169825
9637.66	-0.018927
10163.3	-0.0198493
11039.5	-0.0213836
12748	-0.0245077
13098.4	-0.0251776
15026	-0.028761
15201.2	-0.0290835
15858.3	-0.03029
16909.7	-0.0321938
17260.1	-0.0328238
17523	-0.0332958
18662	-0.0353229
21027.6	-0.039506
4117.9	0.00213836
4643.59	-0.0009993
5519.74	-0.00527815
6833.97	-0.0110656
7315.86	-0.0128028
8805.31	-0.017417
9681.45	-0.0189888
10207.2	-0.0199272
11083.3	-0.0214517
12441.3	-0.0239292
13843.2	-0.0265712
14807	-0.0283566
15902.1	-0.0303694
15858.3	-0.03029
16909.7	-0.0321938
17216.3	-0.0327447
18618.2	-0.0352453
19581.9	-0.03695
20677.2	-0.0388864
3285.57	0.00698607
4249.32	0.00133187
5519.74	-0.00527815
6395.9	-0.00946453
7929.17	-0.0151122
8235.79	-0.0160903
9637.66	-0.018927
10645.2	-0.020707
11740.4	-0.0226263
12397.5	-0.0238514
13448.9	-0.0258347
13799.4	-0.0264902
15332.6	-0.0293268
15858.3	-0.03029
16997.3	-0.032351
17260.1	-0.0328238
17917.2	-0.0339994
20195.2	-0.0380344
20940	-0.0393512
3416.99	0.006399
4117.9	0.00213836
5432.13	-0.00485806
7184.41	-0.0123587
8235.79	-0.0160903
9550	-0.0187928
11039.5	-0.0213836
11784.2	-0.0227067
13054.6	-0.0250943
13799.4	-0.0264902
15858.3	-0.03029
17216.3	-0.0327447
19319.1	-0.0364853
20326.7	-0.0382668
