# Supplementary material for: A Graphical Alternating Conditional Expectation to Predict Hydrate Phase Equilibrium Conditions for Sweet and Sour Natural Gases
Source: Hindawi journal article supplement (doi:10.1155/2019/2383961), 2019-01-01
Supplement: f1 [file 2383961.f1.zip › 2383961.f1/Fig2b Optimal transformation of variables as determined by ACE for (b) pressure in the logarithmic space.xlsx]

## Sheet: Fig 2b
lnP(kPa)	ϕ2(lnP)
7.95538	-0.354583
7.9807	-0.329761
8.00539	-0.305604
8.00539	-0.305604
8.05302	-0.258505
8.07601	-0.235481
8.09848	-0.213204
8.12046	-0.191477
8.14197	-0.170309
8.16302	-0.149529
8.18364	-0.128829
8.18364	-0.128829
8.22365	-0.0887852
8.24306	-0.0691359
8.26211	-0.0496182
8.2808	-0.0303644
8.29915	-0.0113668
8.33487	0.0258469
8.36936	0.0613671
8.40269	0.0955885
8.41895	0.112397
8.4507	0.145707
8.49651	0.193652
8.52593	0.225081
8.5545	0.255995
8.58228	0.286369
8.60931	0.315906
8.62255	0.330354
8.62255	0.330354
8.63562	0.344743
8.64853	0.359186
8.68627	0.40095
8.72264	0.4414
8.73447	0.454703
8.69854	0.414573
8.74617	0.467887
8.75773	0.481135
8.76916	0.494225
8.79163	0.520072
8.81361	0.54562
8.85617	0.595336
8.87679	0.619365
8.88694	0.631339
8.91679	0.666254
8.93621	0.688946
8.95526	0.711283
8.9923	0.754685
9.02802	0.796966
9.04541	0.817642
9.07094	0.848151
9.09584	0.877942
9.1281	0.916622
9.15935	0.953841
9.1971	0.9988
9.24765	1.05866
9.25466	1.06697
9.29577	1.11562
9.3157	1.13927
9.35441	1.18501
9.36072	1.19245
9.36699	1.19983
9.40981	1.25025
9.43931	1.28497
9.4623	1.31198
9.51757	1.37699
9.55451	1.42051
9.59014	1.4625
9.6197	1.49737
9.64368	1.52567
9.68089	1.56965
9.72117	1.61728
9.74714	1.64803
9.78899	1.6976
9.83309	1.74989
9.87155	1.79553
9.90859	1.83949
9.94079	1.87771
9.98555	1.93082
7.12503	-1.14183
7.12503	-1.14183
7.12503	-1.14183
7.12503	-1.14183
7.12503	-1.14183
7.18219	-1.08918
7.18219	-1.08918
7.23626	-1.0391
7.28755	-0.991177
7.33634	-0.945663
7.33634	-0.945663
7.38286	-0.90209
7.38286	-0.90209
7.5107	-0.780703
7.46988	-0.819542
7.5107	-0.780703
7.54991	-0.743371
7.58766	-0.707216
7.58766	-0.707216
7.62402	-0.672699
7.65911	-0.639235
7.69302	-0.60685
7.72581	-0.575438
7.75756	-0.544943
7.75756	-0.544943
7.81818	-0.486838
7.84717	-0.459053
7.87534	-0.432021
7.90274	-0.405596
7.92941	-0.37975
7.9807	-0.329761
8.00539	-0.305604
8.00539	-0.305604
8.02949	-0.281906
8.07601	-0.235481
8.09848	-0.213204
8.14197	-0.170309
8.16302	-0.149529
8.16302	-0.149529
8.20384	-0.10871
8.22365	-0.0887852
8.2808	-0.0303644
8.2808	-0.0303644
8.31717	0.00745232
8.33487	0.0258469
8.35226	0.0438363
8.38616	0.0786433
8.43495	0.129123
8.46621	0.161884
8.49651	0.193652
8.52593	0.225081
8.5545	0.255995
8.56849	0.271237
8.59589	0.301319
8.63562	0.344743
8.64853	0.359186
8.68627	0.40095
8.71066	0.428021
8.75773	0.481135
8.78046	0.507162
8.82442	0.558262
8.85617	0.595336
8.89699	0.643106
8.95526	0.711283
8.98317	0.744002
9.01921	0.7865
9.03675	0.807352
9.05399	0.827849
9.07094	0.848151
9.09584	0.877942
9.1121	0.897452
9.13601	0.926072
9.15935	0.953841
9.1971	0.9988
9.26163	1.07522
9.3091	1.13142
9.34168	1.16998
9.37322	1.20717
9.42762	1.2712
9.49032	1.34493
9.53885	1.40205
9.57503	1.44469
9.59513	1.46838
9.63893	1.52006
9.68998	1.58039
9.71677	1.61207
6.68971	-1.51436
6.68971	-1.51436
6.68971	-1.51436
6.68971	-1.51436
6.77672	-1.445
6.77672	-1.445
6.77672	-1.445
6.85677	-1.37879
6.85677	-1.37879
6.85677	-1.37879
6.93088	-1.31532
6.93088	-1.31532
6.93088	-1.31532
6.93088	-1.31532
6.99987	-1.25459
6.99987	-1.25459
6.99987	-1.25459
7.06441	-1.19671
7.12503	-1.14183
7.12503	-1.14183
7.12503	-1.14183
7.18219	-1.08918
7.18219	-1.08918
7.23626	-1.0391
7.23626	-1.0391
7.23626	-1.0391
7.28755	-0.991177
7.33634	-0.945663
7.28755	-0.991177
7.33634	-0.945663
7.38286	-0.90209
7.38286	-0.90209
7.38286	-0.90209
7.42732	-0.85989
7.42732	-0.85989
7.46988	-0.819542
7.46988	-0.819542
7.5107	-0.780703
7.54991	-0.743371
7.58766	-0.707216
7.62402	-0.672699
7.69302	-0.60685
7.69302	-0.60685
7.72581	-0.575438
7.78833	-0.515419
7.81818	-0.486838
7.87534	-0.432021
7.90274	-0.405596
7.95538	-0.354583
8.02949	-0.281906
8.07601	-0.235481
8.09848	-0.213204
8.16302	-0.149529
8.20384	-0.10871
8.24306	-0.0691359
8.29915	-0.0113668
8.35226	0.0438363
8.41895	0.112397
8.46621	0.161884
8.52593	0.225081
8.59589	0.301319
8.66127	0.373271
8.69854	0.414573
8.73447	0.454703
8.79163	0.520072
8.8457	0.58311
8.92655	0.677653
8.97395	0.73319
9.00135	0.765361
9.04541	0.817642
9.09584	0.877942
9.15935	0.953841
9.18966	0.989906
9.22629	1.03335
9.26163	1.07522
9.3157	1.13927
9.33524	1.16238
9.36072	1.19245
9.40981	1.25025
9.43931	1.28497
6.37419	-1.75398
6.37419	-1.75398
6.37419	-1.75398
6.49197	-1.67076
6.49197	-1.67076
6.49197	-1.67076
6.49197	-1.67076
6.59734	-1.58812
6.49197	-1.67076
6.59734	-1.58812
6.59734	-1.58812
6.69264	-1.51164
6.69264	-1.51164
6.69264	-1.51164
6.77966	-1.44217
6.77966	-1.44217
6.77966	-1.44217
6.8597	-1.37643
6.9338	-1.31263
6.9338	-1.31263
6.9338	-1.31263
6.9338	-1.31263
6.9338	-1.31263
7.0028	-1.25177
7.06734	-1.19414
7.06734	-1.19414
7.06734	-1.19414
7.06734	-1.19414
7.12796	-1.13921
7.12796	-1.13921
7.18512	-1.08648
7.18512	-1.08648
7.23919	-1.03639
7.23919	-1.03639
7.29048	-0.988529
7.29048	-0.988529
7.33927	-0.943031
7.33927	-0.943031
7.38579	-0.899195
7.43024	-0.857188
7.43024	-0.857188
7.4728	-0.816825
7.51362	-0.777975
7.55285	-0.740474
7.59058	-0.704361
7.62696	-0.669959
7.66204	-0.636444
7.69594	-0.604109
7.69594	-0.604109
7.76048	-0.542118
7.82111	-0.484028
7.8501	-0.456258
7.95831	-0.351692
8.00832	-0.302817
8.05595	-0.255554
8.10141	-0.210371
8.16595	-0.146541
8.18657	-0.125894
8.22657	-0.0858762
8.26504	-0.0466256
8.3201	0.0105054
8.37229	0.0643695
8.42188	0.115571
8.4844	0.180954
8.52885	0.228242
8.57141	0.274419
8.62548	0.333534
8.67677	0.390431
8.76066	0.484551
8.80561	0.536326
8.86946	0.610797
8.89992	0.646547
8.93914	0.692371
8.97688	0.736631
9.03968	0.810842
9.07387	0.851632
9.11503	0.900965
9.14678	0.938934
9.19259	0.993412
9.2435	1.05375
9.30539	1.12702
9.36365	1.1959
9.39462	1.23236
9.42464	1.26769
9.45953	1.30873
9.5205	1.38044
9.59806	1.47184
9.66539	1.55132
9.71085	1.60507
9.76702	1.67156
9.80818	1.72034
9.83601	1.75336
6.36755	-1.75816
6.3664	-1.75889
6.36549	-1.75947
6.48383	-1.67722
6.3641	-1.76034
6.48219	-1.67869
6.48116	-1.6802
6.58614	-1.59755
6.58485	-1.59873
6.58429	-1.59899
6.58355	-1.59948
6.58281	-1.60002
6.67861	-1.52319
6.67794	-1.52374
6.67659	-1.52478
6.76387	-1.4553
6.844	-1.38928
6.84314	-1.39012
6.84272	-1.39055
6.84214	-1.39119
6.91698	-1.32732
6.91645	-1.32775
6.91592	-1.32821
6.98549	-1.26734
7.05008	-1.20947
7.04939	-1.21019
7.11053	-1.15506
7.10987	-1.1557
7.16753	-1.10267
7.16722	-1.10294
7.16671	-1.10344
7.22146	-1.05291
7.22077	-1.05357
7.322	-0.959022
7.36881	-0.915393
7.36813	-0.916067
7.41304	-0.873449
7.45593	-0.832785
7.49692	-0.793818
7.53621	-0.756447
7.5741	-0.720194
7.61053	-0.685481
7.64587	-0.651906
7.71301	-0.587725
7.77582	-0.527392
7.89116	-0.416817
7.91792	-0.390868
7.99479	-0.315959
8.01899	-0.292301
8.08847	-0.223058
8.13228	-0.179833
8.17432	-0.138205
8.21455	-0.0979482
8.29074	-0.0200784
8.32669	0.0173018
8.37836	0.0706332
8.44334	0.138036
8.50439	0.20199
8.54777	0.248726
8.57576	0.279169
8.65522	0.366609
8.70491	0.421622
8.75225	0.474805
8.80847	0.539649
8.8617	0.601701
8.88221	0.625757
8.94136	0.694973
8.99723	0.76051
9.05012	0.823212
9.0922	0.873596
9.14825	0.94064
9.19392	0.995021
9.23761	1.04676
9.29973	1.12032
9.33267	1.15934
9.3832	1.21892
9.4313	1.27554
9.4828	1.33608
9.54233	1.40616
9.57845	1.44873
9.62789	1.50704
9.69324	1.58425
9.74175	1.64164
5.90713	-2.0486
5.90713	-2.0486
5.90713	-2.0486
6.08945	-1.93359
6.08945	-1.93359
6.08945	-1.93359
6.2436	-1.83635
6.2436	-1.83635
6.37714	-1.7514
6.37714	-1.7514
6.37714	-1.7514
6.37714	-1.7514
6.49492	-1.66839
6.49492	-1.66839
6.49492	-1.66839
6.60026	-1.58504
6.60026	-1.58504
6.60026	-1.58504
6.69558	-1.50909
6.69558	-1.50909
6.78259	-1.4395
6.86263	-1.37386
6.86263	-1.37386
6.93674	-1.30998
7.00573	-1.24903
7.00573	-1.24903
7.07027	-1.19179
7.18806	-1.0838
7.24213	-1.0337
7.29342	-0.9858
7.38873	-0.896432
7.43318	-0.854481
7.47574	-0.814054
7.55578	-0.737605
7.59352	-0.7016
7.66498	-0.633655
7.76342	-0.539281
7.79419	-0.509798
7.85303	-0.453444
7.9086	-0.399887
7.96125	-0.348787
7.98657	-0.324022
8.05888	-0.252605
8.08187	-0.229599
8.12633	-0.185698
8.14783	-0.164525
8.22951	-0.0829197
8.26798	-0.0436083
8.37522	0.0673917
8.44082	0.13531
8.51719	0.215677
8.56037	0.262368
8.64149	0.351297
8.71653	0.434566
8.76359	0.48788
8.84098	0.577597
8.96112	0.718191
8.98903	0.750877
9.05986	0.834883
9.16522	0.960795
9.22494	1.03176
9.28129	1.09847
9.33464	1.16165
9.40967	1.25008
9.51262	1.37117
9.58089	1.4516
9.70486	1.59798
9.76996	1.67504
9.82711	1.7428
9.85065	1.77073
9.90349	1.83343
9.93604	1.87207
9.96411	1.90538
7.96946	-0.340755
8.40478	0.0977618
8.61609	0.323338
8.77702	0.503218
8.90377	0.65104
9.05792	0.832559
9.17343	0.970595
9.22654	1.03365
9.30924	1.1316
9.45313	1.30121
9.48025	1.33308
9.61754	1.49482
9.62913	1.5085
9.67145	1.55848
9.73564	1.63441
9.75616	1.65869
9.77127	1.67659
9.83424	1.75126
9.95359	1.89289
8.3231	0.0135916
8.44324	0.13792
8.61609	0.323338
8.82966	0.564334
8.8978	0.644057
9.08311	0.862706
9.17797	0.976012
9.23085	1.03875
9.3132	1.1363
9.42878	1.27257
9.53555	1.39817
9.60285	1.4775
9.67421	1.56175
9.67145	1.55848
9.73564	1.63441
9.75361	1.65569
9.8319	1.74848
9.88236	1.80836
9.93679	1.87295
8.0973	-0.214302
8.35451	0.0461416
8.61609	0.323338
8.76341	0.487709
8.9783	0.738298
9.01624	0.782987
9.17343	0.970595
9.27287	1.08851
9.37079	1.2043
9.42525	1.26841
9.50665	1.36415
9.53238	1.39443
9.63774	1.51866
9.67145	1.55848
9.74081	1.64053
9.75616	1.65869
9.79352	1.70296
9.9132	1.84496
9.94942	1.88794
8.13652	-0.175664
8.3231	0.0135916
8.60009	0.305873
8.87967	0.622741
9.01624	0.782987
9.1643	0.95969
9.30924	1.1316
9.37452	1.20869
9.4769	1.32914
9.53238	1.39443
9.67145	1.55848
9.75361	1.65569
9.86885	1.79233
9.91969	1.85266
