# Supplementary material for: A Graphical Alternating Conditional Expectation to Predict Hydrate Phase Equilibrium Conditions for Sweet and Sour Natural Gases
Source: Hindawi journal article supplement (doi:10.1155/2019/2383961), 2019-01-01
Supplement: f1 [file 2383961.f1.zip › 2383961.f1/Fig2c Optimal transformation of variables as determined by ACE for (c) gas gravity.xlsx]

## Sheet: Fig 2c
γg	ϕ3(lnγ)
0.54	-1.0742
0.54	-1.0742
0.54	-1.0742
0.54	-1.0742
0.54	-1.0742
0.54	-1.0742
0.54	-1.0742
0.54	-1.0742
0.54	-1.0742
0.54	-1.0742
0.54	-1.0742
0.54	-1.0742
0.54	-1.0742
0.54	-1.0742
0.54	-1.0742
0.54	-1.0742
0.54	-1.0742
0.54	-1.0742
0.54	-1.0742
0.54	-1.0742
0.54	-1.0742
0.54	-1.0742
0.54	-1.0742
0.54	-1.0742
0.54	-1.0742
0.54	-1.0742
0.54	-1.0742
0.54	-1.0742
0.54	-1.0742
0.54	-1.0742
0.54	-1.0742
0.54	-1.0742
0.54	-1.0742
0.54	-1.0742
0.54	-1.0742
0.54	-1.0742
0.54	-1.0742
0.54	-1.0742
0.54	-1.0742
0.54	-1.0742
0.54	-1.0742
0.54	-1.0742
0.54	-1.0742
0.54	-1.0742
0.54	-1.0742
0.54	-1.0742
0.54	-1.0742
0.54	-1.0742
0.54	-1.0742
0.54	-1.0742
0.54	-1.0742
0.54	-1.0742
0.54	-1.0742
0.54	-1.0742
0.54	-1.0742
0.54	-1.0742
0.54	-1.0742
0.54	-1.0742
0.54	-1.0742
0.54	-1.0742
0.54	-1.0742
0.54	-1.0742
0.54	-1.0742
0.54	-1.0742
0.54	-1.0742
0.54	-1.0742
0.54	-1.0742
0.54	-1.0742
0.54	-1.0742
0.54	-1.0742
0.54	-1.0742
0.54	-1.0742
0.54	-1.0742
0.54	-1.0742
0.54	-1.0742
0.54	-1.0742
0.54	-1.0742
0.54	-1.0742
0.6	-0.197396
0.6	-0.197396
0.6	-0.197396
0.6	-0.197396
0.6	-0.197396
0.6	-0.197396
0.6	-0.197396
0.6	-0.197396
0.6	-0.197396
0.6	-0.197396
0.6	-0.197396
0.6	-0.197396
0.6	-0.197396
0.6	-0.197396
0.6	-0.197396
0.6	-0.197396
0.6	-0.197396
0.6	-0.197396
0.6	-0.197396
0.6	-0.197396
0.6	-0.197396
0.6	-0.197396
0.6	-0.197396
0.6	-0.197396
0.6	-0.197396
0.6	-0.197396
0.6	-0.197396
0.6	-0.197396
0.6	-0.197396
0.6	-0.197396
0.6	-0.197396
0.6	-0.197396
0.6	-0.197396
0.6	-0.197396
0.6	-0.197396
0.6	-0.197396
0.6	-0.197396
0.6	-0.197396
0.6	-0.197396
0.6	-0.197396
0.6	-0.197396
0.6	-0.197396
0.6	-0.197396
0.6	-0.197396
0.6	-0.197396
0.6	-0.197396
0.6	-0.197396
0.6	-0.197396
0.6	-0.197396
0.6	-0.197396
0.6	-0.197396
0.6	-0.197396
0.6	-0.197396
0.6	-0.197396
0.6	-0.197396
0.6	-0.197396
0.6	-0.197396
0.6	-0.197396
0.6	-0.197396
0.6	-0.197396
0.6	-0.197396
0.6	-0.197396
0.6	-0.197396
0.6	-0.197396
0.6	-0.197396
0.6	-0.197396
0.6	-0.197396
0.6	-0.197396
0.6	-0.197396
0.6	-0.197396
0.6	-0.197396
0.6	-0.197396
0.6	-0.197396
0.6	-0.197396
0.6	-0.197396
0.6	-0.197396
0.6	-0.197396
0.6	-0.197396
0.6	-0.197396
0.6	-0.197396
0.6	-0.197396
0.6	-0.197396
0.6	-0.197396
0.6	-0.197396
0.6	-0.197396
0.6	-0.197396
0.7	0.136707
0.7	0.136707
0.7	0.136707
0.7	0.136707
0.7	0.136707
0.7	0.136707
0.7	0.136707
0.7	0.136707
0.7	0.136707
0.7	0.136707
0.7	0.136707
0.7	0.136707
0.7	0.136707
0.7	0.136707
0.7	0.136707
0.7	0.136707
0.7	0.136707
0.7	0.136707
0.7	0.136707
0.7	0.136707
0.7	0.136707
0.7	0.136707
0.7	0.136707
0.7	0.136707
0.7	0.136707
0.7	0.136707
0.7	0.136707
0.7	0.136707
0.7	0.136707
0.7	0.136707
0.7	0.136707
0.7	0.136707
0.7	0.136707
0.7	0.136707
0.7	0.136707
0.7	0.136707
0.7	0.136707
0.7	0.136707
0.7	0.136707
0.7	0.136707
0.7	0.136707
0.7	0.136707
0.7	0.136707
0.7	0.136707
0.7	0.136707
0.7	0.136707
0.7	0.136707
0.7	0.136707
0.7	0.136707
0.7	0.136707
0.7	0.136707
0.7	0.136707
0.7	0.136707
0.7	0.136707
0.7	0.136707
0.7	0.136707
0.7	0.136707
0.7	0.136707
0.7	0.136707
0.7	0.136707
0.7	0.136707
0.7	0.136707
0.7	0.136707
0.7	0.136707
0.7	0.136707
0.7	0.136707
0.7	0.136707
0.7	0.136707
0.7	0.136707
0.7	0.136707
0.7	0.136707
0.7	0.136707
0.7	0.136707
0.7	0.136707
0.7	0.136707
0.7	0.136707
0.7	0.136707
0.7	0.136707
0.7	0.136707
0.7	0.136707
0.8	0.284329
0.8	0.284329
0.8	0.284329
0.8	0.284329
0.8	0.284329
0.8	0.284329
0.8	0.284329
0.8	0.284329
0.8	0.284329
0.8	0.284329
0.8	0.284329
0.8	0.284329
0.8	0.284329
0.8	0.284329
0.8	0.284329
0.8	0.284329
0.8	0.284329
0.8	0.284329
0.8	0.284329
0.8	0.284329
0.8	0.284329
0.8	0.284329
0.8	0.284329
0.8	0.284329
0.8	0.284329
0.8	0.284329
0.8	0.284329
0.8	0.284329
0.8	0.284329
0.8	0.284329
0.8	0.284329
0.8	0.284329
0.8	0.284329
0.8	0.284329
0.8	0.284329
0.8	0.284329
0.8	0.284329
0.8	0.284329
0.8	0.284329
0.8	0.284329
0.8	0.284329
0.8	0.284329
0.8	0.284329
0.8	0.284329
0.8	0.284329
0.8	0.284329
0.8	0.284329
0.8	0.284329
0.8	0.284329
0.8	0.284329
0.8	0.284329
0.8	0.284329
0.8	0.284329
0.8	0.284329
0.8	0.284329
0.8	0.284329
0.8	0.284329
0.8	0.284329
0.8	0.284329
0.8	0.284329
0.8	0.284329
0.8	0.284329
0.8	0.284329
0.8	0.284329
0.8	0.284329
0.8	0.284329
0.8	0.284329
0.8	0.284329
0.8	0.284329
0.8	0.284329
0.8	0.284329
0.8	0.284329
0.8	0.284329
0.8	0.284329
0.8	0.284329
0.8	0.284329
0.8	0.284329
0.8	0.284329
0.8	0.284329
0.8	0.284329
0.8	0.284329
0.8	0.284329
0.8	0.284329
0.8	0.284329
0.8	0.284329
0.8	0.284329
0.8	0.284329
0.8	0.284329
0.8	0.284329
0.8	0.284329
0.8	0.284329
0.8	0.284329
0.9	0.407863
0.9	0.407863
0.9	0.407863
0.9	0.407863
0.9	0.407863
0.9	0.407863
0.9	0.407863
0.9	0.407863
0.9	0.407863
0.9	0.407863
0.9	0.407863
0.9	0.407863
0.9	0.407863
0.9	0.407863
0.9	0.407863
0.9	0.407863
0.9	0.407863
0.9	0.407863
0.9	0.407863
0.9	0.407863
0.9	0.407863
0.9	0.407863
0.9	0.407863
0.9	0.407863
0.9	0.407863
0.9	0.407863
0.9	0.407863
0.9	0.407863
0.9	0.407863
0.9	0.407863
0.9	0.407863
0.9	0.407863
0.9	0.407863
0.9	0.407863
0.9	0.407863
0.9	0.407863
0.9	0.407863
0.9	0.407863
0.9	0.407863
0.9	0.407863
0.9	0.407863
0.9	0.407863
0.9	0.407863
0.9	0.407863
0.9	0.407863
0.9	0.407863
0.9	0.407863
0.9	0.407863
0.9	0.407863
0.9	0.407863
0.9	0.407863
0.9	0.407863
0.9	0.407863
0.9	0.407863
0.9	0.407863
0.9	0.407863
0.9	0.407863
0.9	0.407863
0.9	0.407863
0.9	0.407863
0.9	0.407863
0.9	0.407863
0.9	0.407863
0.9	0.407863
0.9	0.407863
0.9	0.407863
0.9	0.407863
0.9	0.407863
0.9	0.407863
0.9	0.407863
0.9	0.407863
0.9	0.407863
0.9	0.407863
0.9	0.407863
0.9	0.407863
0.9	0.407863
0.9	0.407863
0.9	0.407863
0.9	0.407863
0.9	0.407863
0.9	0.407863
0.9	0.407863
0.9	0.407863
1	0.535395
1	0.535395
1	0.535395
1	0.535395
1	0.535395
1	0.535395
1	0.535395
1	0.535395
1	0.535395
1	0.535395
1	0.535395
1	0.535395
1	0.535395
1	0.535395
1	0.535395
1	0.535395
1	0.535395
1	0.535395
1	0.535395
1	0.535395
1	0.535395
1	0.535395
1	0.535395
1	0.535395
1	0.535395
1	0.535395
1	0.535395
1	0.535395
1	0.535395
1	0.535395
1	0.535395
1	0.535395
1	0.535395
1	0.535395
1	0.535395
1	0.535395
1	0.535395
1	0.535395
1	0.535395
1	0.535395
1	0.535395
1	0.535395
1	0.535395
1	0.535395
1	0.535395
1	0.535395
1	0.535395
1	0.535395
1	0.535395
1	0.535395
1	0.535395
1	0.535395
1	0.535395
1	0.535395
1	0.535395
1	0.535395
1	0.535395
1	0.535395
1	0.535395
1	0.535395
1	0.535395
1	0.535395
1	0.535395
1	0.535395
1	0.535395
1	0.535395
1	0.535395
1	0.535395
1	0.535395
1	0.535395
1	0.535395
1	0.535395
1	0.535395
0.553	-0.997627
0.553	-0.997627
0.553	-0.997627
0.553	-0.997627
0.553	-0.997627
0.553	-0.997627
0.553	-0.997627
0.553	-0.997627
0.553	-0.997627
0.553	-0.997627
0.553	-0.997627
0.553	-0.997627
0.553	-0.997627
0.553	-0.997627
0.553	-0.997627
0.553	-0.997627
0.553	-0.997627
0.553	-0.997627
0.553	-0.997627
0.843	0.348062
0.843	0.348062
0.843	0.348062
0.843	0.348062
0.843	0.348062
0.843	0.348062
0.843	0.348062
0.843	0.348062
0.843	0.348062
0.843	0.348062
0.843	0.348062
0.843	0.348062
0.843	0.348062
0.843	0.348062
0.843	0.348062
0.843	0.348062
0.843	0.348062
0.843	0.348062
0.843	0.348062
0.747	0.208807
0.747	0.208807
0.747	0.208807
0.747	0.208807
0.747	0.208807
0.747	0.208807
0.747	0.208807
0.747	0.208807
0.747	0.208807
0.747	0.208807
0.747	0.208807
0.747	0.208807
0.747	0.208807
0.747	0.208807
0.747	0.208807
0.747	0.208807
0.747	0.208807
0.747	0.208807
0.747	0.208807
0.65	-0.063801
0.65	-0.063801
0.65	-0.063801
0.65	-0.063801
0.65	-0.063801
0.65	-0.063801
0.65	-0.063801
0.65	-0.063801
0.65	-0.063801
0.65	-0.063801
0.65	-0.063801
0.65	-0.063801
0.65	-0.063801
0.65	-0.063801
