# Supplementary material for: A Graphical Alternating Conditional Expectation to Predict Hydrate Phase Equilibrium Conditions for Sweet and Sour Natural Gases
Source: Hindawi journal article supplement (doi:10.1155/2019/2383961), 2019-01-01
Supplement: f1 [file 2383961.f1.zip › 2383961.f1/Fig2d Optimal transformation of variables as determined by ACE for (d) temperature.xlsx]

## Sheet: Fig 2d
T (K)	θ(T)
273.9	-1.43661
274	-1.41976
274.3	-1.38863
274.4	-1.37822
274.7	-1.34676
275	-1.31639
275.2	-1.2938
275.5	-1.26171
275.7	-1.24151
275.9	-1.21862
276	-1.20919
276.2	-1.18615
276.4	-1.16161
276.6	-1.14386
276.9	-1.10952
277	-1.09844
277.3	-1.0665
277.4	-1.05536
277.8	-1.00932
278.1	-0.977142
278.4	-0.943542
278.6	-0.919739
279	-0.87465
279.2	-0.85339
279.5	-0.81498
279.7	-0.796343
279.9	-0.773237
280	-0.761676
280	-0.761676
280.1	-0.748619
280.3	-0.723762
280.6	-0.689987
280.8	-0.667856
281	-0.644127
280.7	-0.679667
281	-0.644127
281.2	-0.618793
281.3	-0.60682
281.6	-0.572268
281.8	-0.546655
282.1	-0.510185
282.2	-0.49795
282.4	-0.474911
282.7	-0.437817
282.9	-0.411337
283.1	-0.386277
283.4	-0.348585
283.7	-0.310975
283.8	-0.298414
284.1	-0.262282
284.3	-0.235558
284.6	-0.197612
284.8	-0.173619
285.2	-0.113631
285.6	-0.0676561
285.7	-0.0544104
286	-0.0162312
286.2	0.0104987
286.4	0.0393149
286.6	0.066764
286.7	0.0805711
287	0.120699
287.2	0.154442
287.4	0.177747
287.9	0.250371
288.2	0.295752
288.5	0.344321
288.8	0.390252
289	0.425153
289.3	0.47285
289.6	0.522984
289.9	0.574014
290.2	0.629854
290.6	0.708233
290.9	0.769992
291.2	0.831326
291.5	0.89628
291.9	0.986614
274	-1.41976
274.1	-1.40938
274.2	-1.39901
274.4	-1.37822
274.7	-1.34676
275.3	-1.28314
275.6	-1.2523
275.9	-1.21862
276.1	-1.19836
276.4	-1.16161
276.6	-1.14386
276.8	-1.12057
277.1	-1.08735
277.4	-1.05536
277.6	-1.03305
277.8	-1.00932
278.2	-0.964546
278.5	-0.930938
278.7	-0.908525
278.9	-0.885967
279.1	-0.86473
279.4	-0.830677
279.7	-0.796343
280	-0.761676
280.1	-0.748619
280.3	-0.723762
280.6	-0.689987
281	-0.644127
281.2	-0.618793
281.5	-0.584292
281.8	-0.546655
282	-0.522378
282.1	-0.510185
282.4	-0.474911
282.5	-0.461048
282.8	-0.425371
283.1	-0.386277
283.3	-0.362742
283.4	-0.348585
283.6	-0.325082
283.9	-0.285853
284.2	-0.249718
284.4	-0.222945
284.6	-0.197612
284.7	-0.186487
284.9	-0.160699
285.1	-0.133192
285.5	-0.0841381
285.8	-0.041144
286	-0.0162312
286.1	-0.00292155
286.4	0.0393149
286.5	0.0530104
286.8	0.0979417
287.1	0.136599
287.2	0.154442
287.6	0.208371
287.7	0.226496
288.1	0.280396
288.2	0.295752
288.5	0.344321
288.7	0.37607
289.1	0.441692
289.4	0.493668
289.6	0.522984
289.9	0.574014
290.1	0.609282
290.2	0.629854
290.3	0.646077
290.5	0.680694
290.6	0.708233
290.7	0.728668
290.9	0.769992
291.2	0.831326
291.7	0.942737
291.9	0.986614
292.2	1.04994
292.3	1.08036
292.7	1.16384
293	1.23096
293.3	1.29854
293.6	1.36624
293.6	1.36624
293.9	1.43444
294.1	1.48057
294.2	1.50389
274.2	-1.39901
274.4	-1.37822
274.6	-1.35859
274.6	-1.35859
274.8	-1.33622
274.9	-1.32698
275.1	-1.30444
275.3	-1.28314
275.5	-1.26171
275.7	-1.24151
275.9	-1.21862
276.2	-1.18615
276.3	-1.17526
276.3	-1.17526
276.6	-1.14386
276.8	-1.12057
277	-1.09844
277.2	-1.07624
277.5	-1.0442
277.7	-1.0205
277.9	-0.995326
278.2	-0.964546
278.4	-0.943542
278.7	-0.908525
278.8	-0.897263
279	-0.87465
279.2	-0.85339
279.5	-0.81498
279.5	-0.81498
279.7	-0.796343
279.8	-0.783353
280	-0.761676
280.2	-0.738405
280.5	-0.703224
280.6	-0.689987
280.8	-0.667856
280.9	-0.656031
281.1	-0.630725
281.2	-0.618793
281.5	-0.584292
281.9	-0.534527
282.2	-0.49795
282.5	-0.461048
282.9	-0.411337
283.2	-0.375321
283.6	-0.325082
283.9	-0.285853
284.2	-0.249718
284.5	-0.210294
285	-0.146148
285.5	-0.0841381
285.7	-0.0544104
286	-0.0162312
286.3	0.0256794
286.5	0.0530104
287	0.120699
287.5	0.19397
287.9	0.250371
288.2	0.295752
288.7	0.37607
289.2	0.458303
289.7	0.546298
289.9	0.574014
290.2	0.629854
290.5	0.680694
290.8	0.74924
291.3	0.861035
291.5	0.89628
291.7	0.942737
291.9	0.986614
292.2	1.04994
292.5	1.11641
292.6	1.14147
292.8	1.18618
293	1.23096
293.3	1.29854
293.4	1.32111
293.6	1.36624
293.8	1.41157
294.1	1.48057
273.2	-1.50404
273.5	-1.47811
273.9	-1.43661
274.1	-1.40938
274.5	-1.36908
274.6	-1.35859
274.7	-1.34676
274.8	-1.33622
275	-1.31639
275.2	-1.2938
275.4	-1.27245
275.7	-1.24151
275.8	-1.22939
276.2	-1.18615
276.4	-1.16161
276.6	-1.14386
276.7	-1.13156
277.1	-1.08735
277.4	-1.05536
277.6	-1.03305
277.8	-1.00932
278.1	-0.977142
278.2	-0.964546
278.4	-0.943542
278.7	-0.908525
278.8	-0.897263
278.9	-0.885967
279	-0.87465
279.3	-0.842054
279.5	-0.81498
279.7	-0.796343
279.8	-0.783353
280	-0.761676
280.3	-0.723762
280.6	-0.689987
280.8	-0.667856
281	-0.644127
281.2	-0.618793
281.4	-0.596314
281.7	-0.560242
281.9	-0.534527
282	-0.522378
282.5	-0.461048
282.6	-0.448678
282.9	-0.411337
283.3	-0.362742
283.6	-0.325082
283.8	-0.298414
284	-0.27328
284.3	-0.235558
284.6	-0.197612
284.9	-0.160699
285.7	-0.0544104
286.2	0.0104987
286.4	0.0393149
286.8	0.0979417
287.1	0.136599
287.4	0.177747
287.6	0.208371
287.9	0.250371
288.3	0.3112
288.6	0.360113
288.9	0.406658
289.2	0.458303
289.4	0.493668
289.7	0.546298
289.9	0.574014
290.2	0.629854
290.6	0.708233
290.8	0.74924
291.2	0.831326
291.3	0.861035
291.6	0.9208
291.8	0.964684
292.2	1.04994
292.3	1.08036
292.7	1.16384
292.9	1.20853
293.1	1.25342
293.4	1.32111
293.8	1.41157
294.1	1.48057
294.4	1.55077
294.5	1.58044
294.7	1.6193
294.9	1.66744
295.4	1.79277
295.6	1.84563
295.9	1.91458
296.2	1.99334
296.4	2.04715
296.6	2.09781
274.3	-1.38863
274.6	-1.35859
274.7	-1.34676
274.8	-1.33622
275	-1.31639
275.2	-1.2938
275.4	-1.27245
275.8	-1.22939
276.1	-1.19836
276.2	-1.18615
276.4	-1.16161
276.6	-1.14386
276.8	-1.12057
277	-1.09844
277.4	-1.05536
277.7	-1.0205
278.1	-0.977142
278.3	-0.954746
278.5	-0.930938
278.7	-0.908525
278.8	-0.897263
279	-0.87465
279.2	-0.85339
279.4	-0.830677
279.8	-0.783353
280.1	-0.748619
280.3	-0.723762
280.6	-0.689987
280.8	-0.667856
281	-0.644127
281.2	-0.618793
281.3	-0.60682
281.7	-0.560242
282	-0.522378
282.3	-0.487218
282.6	-0.448678
282.8	-0.425371
283	-0.398813
283.4	-0.348585
283.7	-0.310975
284	-0.27328
284.4	-0.222945
284.6	-0.197612
285.1	-0.133192
285.6	-0.0676561
286.3	0.0256794
286.6	0.066764
286.8	0.0979417
287	0.120699
287.5	0.19397
287.7	0.226496
287.9	0.250371
288.2	0.295752
288.5	0.344321
288.7	0.37607
289	0.425153
289.4	0.493668
289.7	0.546298
290.1	0.609282
290.2	0.629854
290.7	0.728668
290.9	0.769992
291.2	0.831326
291.5	0.89628
291.8	0.964684
291.9	0.986614
292.2	1.04994
292.5	1.11641
292.8	1.18618
293	1.23096
293.3	1.29854
293.5	1.34366
293.8	1.41157
294.1	1.48057
294.3	1.52728
294.5	1.58044
294.8	1.64328
295	1.70086
295.4	1.79277
295.5	1.81444
295.8	1.88939
296.2	1.99334
296.4	2.04715
273.5	-1.47811
273.6	-1.46255
273.9	-1.43661
274.3	-1.38863
274.8	-1.33622
275.1	-1.30444
275.4	-1.27245
275.8	-1.22939
276.1	-1.19836
276.4	-1.16161
276.7	-1.13156
276.9	-1.10952
277.2	-1.07624
277.6	-1.03305
277.9	-0.995326
278.1	-0.977142
278.4	-0.943542
278.6	-0.919739
279	-0.87465
279.4	-0.830677
279.8	-0.783353
280.3	-0.723762
280.5	-0.703224
280.8	-0.667856
281.1	-0.630725
281.3	-0.60682
281.8	-0.546655
282.5	-0.461048
283	-0.398813
283.4	-0.348585
283.9	-0.285853
284.3	-0.235558
284.5	-0.210294
285	-0.146148
285.2	-0.113631
285.8	-0.041144
286.4	0.0393149
286.7	0.0805711
287	0.120699
287.4	0.177747
287.7	0.226496
288	0.267198
288.4	0.326729
288.6	0.360113
288.9	0.406658
289.1	0.441692
289.4	0.493668
289.7	0.546298
290.2	0.629854
290.5	0.680694
290.8	0.74924
291	0.788424
291.3	0.861035
291.6	0.9208
291.8	0.964684
292	1.01411
292.5	1.11641
292.6	1.14147
292.9	1.20853
293.3	1.29854
293.5	1.34366
293.8	1.41157
294	1.45743
294.4	1.55077
294.9	1.66744
295.3	1.76506
296	1.93976
296.4	2.04715
296.8	2.14847
297	2.19279
297.4	2.29411
297.6	2.34477
297.8	2.39543
274.3	-1.38863
278.4	-0.943542
280.5	-0.703224
281.5	-0.584292
283.1	-0.386277
284.5	-0.210294
285.5	-0.0841381
285.9	-0.0295339
286.6	0.066764
287.5	0.19397
288	0.267198
289	0.425153
289.1	0.441692
289.4	0.493668
290	0.591187
290.1	0.609282
290.2	0.629854
290.6	0.708233
291.5	0.89628
290.1	0.609282
290.9	0.769992
291.6	0.9208
292.6	1.14147
293.1	1.25342
293.7	1.38886
294	1.45743
294.2	1.50389
294.5	1.58044
294.9	1.66744
295.3	1.76506
295.6	1.84563
295.9	1.91458
295.9	1.91458
296.1	1.96496
296.3	2.01549
296.6	2.09781
296.8	2.14847
297.1	2.21812
287.1	0.136599
288.4	0.326729
290.2	0.629854
290.8	0.74924
292	1.01411
292.3	1.08036
292.9	1.20853
293.2	1.27595
293.7	1.38886
293.9	1.43444
294.2	1.50389
294.3	1.52728
294.7	1.6193
294.9	1.66744
295	1.70086
295.2	1.74051
295.4	1.79277
295.9	1.91458
296.1	1.96496
283.5	-0.337605
285	-0.146148
287.6	0.208371
289.2	0.458303
290.1	0.609282
291.1	0.809794
291.9	0.986614
292.2	1.04994
292.8	1.18618
293.2	1.27595
293.9	1.43444
294.4	1.55077
295	1.70086
295.3	1.76506
