# Supplementary material for: A Graphical Alternating Conditional Expectation to Predict Hydrate Phase Equilibrium Conditions for Sweet and Sour Natural Gases
Source: Hindawi journal article supplement (doi:10.1155/2019/2383961), 2019-01-01
Supplement: f1 [file 2383961.f1.zip › 2383961.f1/Fig3 Optimal transformation of T versus the sum of the optimal transformation of P ln(p) and γg.xlsx]

## Sheet: Fig 3
Sum tranformed indepent variables	θ(T)
-1.41911	-1.43661
-1.39488	-1.41976
-1.37134	-1.38863
-1.37134	-1.37822
-1.32513	-1.34676
-1.30239	-1.31639
-1.28048	-1.2938
-1.25903	-1.26171
-1.23821	-1.24151
-1.21773	-1.21862
-1.19739	-1.20919
-1.19739	-1.18615
-1.15838	-1.16161
-1.1392	-1.14386
-1.12017	-1.10952
-1.10142	-1.09844
-1.08284	-1.0665
-1.04653	-1.05536
-1.01191	-1.00932
-0.978558	-0.977142
-0.962198	-0.943542
-0.92967	-0.919739
-0.882944	-0.87465
-0.852223	-0.85339
-0.821978	-0.81498
-0.792279	-0.796343
-0.76339	-0.773237
-0.749304	-0.761676
-0.749304	-0.761676
-0.735264	-0.748619
-0.72116	-0.723762
-0.680515	-0.689987
-0.641148	-0.667856
-0.628172	-0.644127
-0.667259	-0.679667
-0.615329	-0.644127
-0.602389	-0.618793
-0.589601	-0.60682
-0.564335	-0.572268
-0.539306	-0.546655
-0.490571	-0.510185
-0.467124	-0.49795
-0.45537	-0.474911
-0.421283	-0.437817
-0.399164	-0.411337
-0.377381	-0.386277
-0.335034	-0.348585
-0.293606	-0.310975
-0.273296	-0.298414
-0.243259	-0.262282
-0.213885	-0.235558
-0.175713	-0.197612
-0.13905	-0.173619
-0.0947013	-0.113631
-0.0357798	-0.0676561
-0.0275934	-0.0544104
0.0202852	-0.0162312
0.0435752	0.0104987
0.0885413	0.0393149
0.0958424	0.066764
0.103089	0.0805711
0.152552	0.120699
0.18659	0.154442
0.213041	0.177747
0.276679	0.250371
0.319253	0.295752
0.360289	0.344321
0.394354	0.390252
0.421977	0.425153
0.464884	0.47285
0.51132	0.522984
0.54128	0.574014
0.589542	0.629854
0.640405	0.708233
0.684753	0.769992
0.727419	0.831326
0.764473	0.89628
0.815909	0.986614
-1.31771	-1.41976
-1.31771	-1.40938
-1.31771	-1.39901
-1.31771	-1.37822
-1.31771	-1.34676
-1.26565	-1.28314
-1.26565	-1.2523
-1.21618	-1.21862
-1.16886	-1.19836
-1.1241	-1.16161
-1.1241	-1.14386
-1.08107	-1.12057
-1.08107	-1.08735
-0.960939	-1.05536
-0.99944	-1.03305
-0.960939	-1.00932
-0.924231	-0.964546
-0.888553	-0.930938
-0.888553	-0.908525
-0.854644	-0.885967
-0.821717	-0.86473
-0.789771	-0.830677
-0.758953	-0.796343
-0.728879	-0.761676
-0.728879	-0.748619
-0.671804	-0.723762
-0.644593	-0.689987
-0.618083	-0.644127
-0.592207	-0.618793
-0.566926	-0.584292
-0.518077	-0.546655
-0.494533	-0.522378
-0.494533	-0.510185
-0.471263	-0.474911
-0.425589	-0.461048
-0.403676	-0.425371
-0.361403	-0.386277
-0.340929	-0.362742
-0.340929	-0.348585
-0.300959	-0.325082
-0.281576	-0.285853
-0.22462	-0.249718
-0.22462	-0.222945
-0.187634	-0.197612
-0.169723	-0.186487
-0.15217	-0.160699
-0.118238	-0.133192
-0.0690684	-0.0841381
-0.037107	-0.041144
-0.00613967	-0.0162312
0.0245821	-0.00292155
0.0548266	0.0393149
0.0697284	0.0530104
0.0991599	0.0979417
0.141541	0.136599
0.155644	0.154442
0.196289	0.208371
0.222618	0.226496
0.274416	0.280396
0.299847	0.295752
0.34992	0.344321
0.386234	0.37607
0.432928	0.441692
0.499424	0.493668
0.531364	0.522984
0.57293	0.574014
0.593397	0.609282
0.613534	0.629854
0.633545	0.646077
0.66292	0.680694
0.682181	0.708233
0.710411	0.728668
0.737754	0.769992
0.782103	0.831326
0.857332	0.942737
0.912641	0.986614
0.950575	1.04994
0.987095	1.08036
1.0499	1.16384
1.12211	1.23096
1.178	1.29854
1.21969	1.36624
1.24284	1.36624
1.29331	1.43444
1.35217	1.48057
1.38306	1.50389
-1.35237	-1.39901
-1.35237	-1.37822
-1.35237	-1.35859
-1.35237	-1.35859
-1.28384	-1.33622
-1.28384	-1.32698
-1.28384	-1.30444
-1.21827	-1.28314
-1.21827	-1.26171
-1.21827	-1.24151
-1.15535	-1.21862
-1.15535	-1.18615
-1.15535	-1.17526
-1.15535	-1.17526
-1.09518	-1.14386
-1.09518	-1.12057
-1.09518	-1.09844
-1.03788	-1.07624
-0.983611	-1.0442
-0.983611	-1.0205
-0.983611	-0.995326
-0.931552	-0.964546
-0.931552	-0.943542
-0.882078	-0.908525
-0.882078	-0.897263
-0.882078	-0.87465
-0.834762	-0.85339
-0.789999	-0.81498
-0.834762	-0.81498
-0.789999	-0.796343
-0.746969	-0.783353
-0.746969	-0.761676
-0.746969	-0.738405
-0.705159	-0.703224
-0.705159	-0.689987
-0.665337	-0.667856
-0.665337	-0.656031
-0.626836	-0.630725
-0.590128	-0.618793
-0.55445	-0.584292
-0.520541	-0.534527
-0.455669	-0.49795
-0.455669	-0.461048
-0.42485	-0.411337
-0.365732	-0.375321
-0.337701	-0.325082
-0.28398	-0.285853
-0.258104	-0.249718
-0.208198	-0.210294
-0.13716	-0.146148
-0.0914863	-0.0841381
-0.0695728	-0.0544104
-0.00682606	-0.0162312
0.0331441	0.0256794
0.0717039	0.0530104
0.128063	0.120699
0.181933	0.19397
0.248709	0.250371
0.296996	0.295752
0.358685	0.37607
0.433263	0.458303
0.503464	0.546298
0.543648	0.574014
0.582736	0.629854
0.646572	0.680694
0.708376	0.74924
0.800734	0.861035
0.854891	0.89628
0.886326	0.942737
0.937612	0.986614
0.997023	1.04994
1.07186	1.11641
1.10743	1.14147
1.15021	1.18618
1.19143	1.23096
1.25448	1.29854
1.2772	1.32111
1.30675	1.36624
1.36346	1.41157
1.3975	1.48057
-1.4414	-1.50404
-1.4414	-1.47811
-1.4414	-1.43661
-1.35926	-1.40938
-1.35926	-1.36908
-1.35926	-1.35859
-1.35926	-1.34676
-1.27761	-1.33622
-1.35926	-1.31639
-1.27761	-1.2938
-1.27761	-1.27245
-1.20206	-1.24151
-1.20206	-1.22939
-1.20206	-1.18615
-1.13339	-1.16161
-1.13339	-1.14386
-1.13339	-1.13156
-1.0683	-1.08735
-1.00502	-1.05536
-1.00502	-1.03305
-1.00502	-1.00932
-1.00502	-0.977142
-1.00502	-0.964546
-0.944754	-0.943542
-0.887723	-0.908525
-0.887723	-0.897263
-0.887723	-0.885967
-0.887723	-0.87465
-0.833397	-0.842054
-0.833397	-0.81498
-0.781267	-0.796343
-0.781267	-0.783353
-0.731767	-0.761676
-0.731767	-0.723762
-0.684567	-0.689987
-0.684567	-0.667856
-0.639719	-0.644127
-0.639719	-0.618793
-0.59647	-0.596314
-0.55491	-0.560242
-0.55491	-0.534527
-0.515017	-0.522378
-0.476528	-0.461048
-0.439653	-0.448678
-0.403976	-0.411337
-0.370268	-0.362742
-0.337227	-0.325082
-0.305389	-0.298414
-0.305389	-0.27328
-0.244371	-0.235558
-0.187318	-0.197612
-0.160142	-0.160699
-0.0577606	-0.0544104
-0.0100317	0.0104987
0.0363318	0.0393149
0.0807692	0.0979417
0.143775	0.136599
0.164032	0.177747
0.20299	0.208371
0.241274	0.250371
0.297069	0.3112
0.34955	0.360113
0.399449	0.406658
0.463204	0.458303
0.509397	0.493668
0.554561	0.546298
0.612308	0.574014
0.667782	0.629854
0.759485	0.708233
0.810112	0.74924
0.883045	0.831326
0.918028	0.861035
0.962709	0.9208
1.00588	0.964684
1.07855	1.04994
1.11869	1.08036
1.16737	1.16384
1.20482	1.20853
1.25851	1.25342
1.31792	1.32111
1.39003	1.41157
1.45776	1.48057
1.49354	1.55077
1.52818	1.58044
1.5684	1.6193
1.63858	1.66744
1.72794	1.79277
1.80553	1.84563
1.85795	1.91458
1.92273	1.99334
1.9702	2.04715
2.00231	2.09781
-1.322	-1.38863
-1.32271	-1.35859
-1.32328	-1.34676
-1.24212	-1.33622
-1.32414	-1.31639
-1.24357	-1.2938
-1.24507	-1.27245
-1.1634	-1.22939
-1.16457	-1.19836
-1.16482	-1.18615
-1.1653	-1.16161
-1.16584	-1.14386
-1.08993	-1.12057
-1.09048	-1.09844
-1.0915	-1.05536
-1.02287	-1.0205
-0.957501	-0.977142
-0.95834	-0.954746
-0.958766	-0.930938
-0.959409	-0.908525
-0.896081	-0.897263
-0.8965	-0.87465
-0.896944	-0.85339
-0.836643	-0.830677
-0.779348	-0.783353
-0.780064	-0.748619
-0.725543	-0.723762
-0.726175	-0.689987
-0.673729	-0.667856
-0.673998	-0.644127
-0.674495	-0.618793
-0.624567	-0.60682
-0.625217	-0.560242
-0.532003	-0.522378
-0.488928	-0.487218
-0.489592	-0.448678
-0.447449	-0.425371
-0.407271	-0.398813
-0.368683	-0.348585
-0.331808	-0.310975
-0.296132	-0.27328
-0.261921	-0.222945
-0.228958	-0.197612
-0.165762	-0.133192
-0.106342	-0.0676561
0.00205788	0.0256794
0.0274518	0.066764
0.100609	0.0979417
0.123804	0.120699
0.191919	0.19397
0.234505	0.226496
0.275473	0.250371
0.314768	0.295752
0.390695	0.344321
0.427195	0.37607
0.479213	0.425153
0.544908	0.493668
0.607254	0.546298
0.652976	0.609282
0.68273	0.629854
0.768134	0.728668
0.821664	0.769992
0.873483	0.831326
0.936897	0.89628
0.997697	0.964684
1.02122	0.986614
1.08878	1.04994
1.15272	1.11641
1.21423	1.18618
1.26389	1.23096
1.33001	1.29854
1.38364	1.34366
1.43457	1.41157
1.50697	1.48057
1.54538	1.52728
1.60389	1.58044
1.65942	1.64328
1.7187	1.70086
1.78728	1.79277
1.82889	1.81444
1.88586	1.88939
1.96118	1.99334
2.01712	2.04715
-1.48154	-1.47811
-1.48154	-1.46255
-1.48154	-1.43661
-1.36768	-1.38863
-1.36768	-1.33622
-1.36768	-1.30444
-1.27159	-1.27245
-1.27159	-1.22939
-1.18779	-1.19836
-1.18779	-1.16161
-1.18779	-1.13156
-1.18779	-1.10952
-1.10586	-1.07624
-1.10586	-1.03305
-1.10586	-0.995326
-1.0235	-0.977142
-1.0235	-0.943542
-1.0235	-0.919739
-0.948466	-0.87465
-0.948466	-0.830677
-0.879677	-0.783353
-0.8147	-0.723762
-0.8147	-0.703224
-0.751307	-0.667856
-0.690964	-0.630725
-0.690964	-0.60682
-0.634351	-0.546655
-0.527549	-0.461048
-0.478049	-0.398813
-0.430816	-0.348585
-0.342682	-0.285853
-0.301234	-0.235558
-0.261192	-0.210294
-0.185742	-0.146148
-0.150214	-0.113631
-0.0833938	-0.041144
0.00950038	0.0393149
0.0384875	0.0805711
0.0936935	0.120699
0.146172	0.177747
0.196141	0.226496
0.220291	0.267198
0.290328	0.326729
0.313013	0.360113
0.356262	0.406658
0.377085	0.441692
0.456946	0.493668
0.49527	0.546298
0.603574	0.629854
0.669759	0.680694
0.748165	0.74924
0.793848	0.788424
0.880736	0.861035
0.96179	0.9208
1.0138	0.964684
1.10167	1.01411
1.23895	1.11641
1.27086	1.14147
1.35326	1.20853
1.47738	1.29854
1.54733	1.34366
1.613	1.41157
1.67518	1.45743
1.76198	1.55077
1.88058	1.66744
1.95923	1.76506
2.10211	1.93976
2.17718	2.04715
2.24311	2.14847
2.27025	2.19279
2.33114	2.29411
2.3686	2.34477
2.40088	2.39543
-1.32903	-1.38863
-0.899873	-0.943542
-0.679567	-0.703224
-0.504239	-0.584292
-0.35954	-0.386277
-0.18205	-0.210294
-0.045959	-0.0841381
0.0161707	-0.0295339
0.112585	0.066764
0.279075	0.19397
0.310274	0.267198
0.468436	0.425153
0.481792	0.441692
0.530566	0.493668
0.604586	0.591187
0.628242	0.609282
0.645667	0.629854
0.718314	0.708233
0.855761	0.89628
0.363792	0.609282
0.484983	0.769992
0.666122	0.9208
0.901331	1.14147
0.979316	1.25342
1.19335	1.38886
1.30509	1.45743
1.36689	1.50389
1.46291	1.58044
1.5967	1.66744
1.71966	1.76506
1.79721	1.84563
1.87944	1.91458
1.87626	1.91458
1.95028	1.96496
1.971	2.01549
2.06129	2.09781
2.11948	2.14847
2.18213	2.21812
0.00149065	0.136599
0.25628	0.326729
0.526867	0.629854
0.687051	0.74924
0.931993	1.01411
0.975703	1.08036
1.16048	1.20853
1.27661	1.27595
1.39048	1.38886
1.45336	1.43444
1.54712	1.50389
1.57675	1.52728
1.69814	1.6193
1.737	1.66744
1.81698	1.70086
1.83468	1.74051
1.87777	1.79277
2.01574	1.91458
2.0574	1.96496
-0.233066	-0.337605
-0.0480711	-0.146148
0.237214	0.208371
0.546581	0.458303
0.703096	0.609282
0.877096	0.809794
1.04641	0.986614
1.12219	1.04994
1.24025	1.18618
1.30414	1.27595
1.46439	1.43444
1.55914	1.55077
1.69204	1.70086
1.7506	1.76506
