# Supplementary material for: A Graphical Alternating Conditional Expectation to Predict Hydrate Phase Equilibrium Conditions for Sweet and Sour Natural Gases
Source: Hindawi journal article supplement (doi:10.1155/2019/2383961), 2019-01-01
Supplement: f1 [file 2383961.f1.zip › 2383961.f1/Fig4a Optimal transformation of variables as determined by ACE for (a) CH4.xlsx]

## Sheet: Fig 4a
CH4(mole%)	ϕ.1(CH4)
100	0.408192
100	0.408192
100	0.408192
100	0.408192
100	0.408192
100	0.408192
100	0.408192
94.5	0.343309
93.5	0.331512
93	0.325614
92	0.313817
92	0.313817
92	0.313817
92	0.313817
91.5	0.307918
91	0.30202
91	0.30202
91	0.30202
90	0.290223
89.6	0.285504
88	0.266629
88	0.266629
87.5	0.260731
87	0.254832
87	0.254832
87	0.254832
87	0.254832
87	0.254832
86	0.243035
85.9	0.241856
85.7	0.239496
85.6	0.238317
83.1	0.208824
82.1	0.197027
81.7	0.192309
81.46	0.189477
81.46	0.189477
80.29	0.175675
80.29	0.175675
79.91	0.171192
79.91	0.171192
79.7	0.168713
79.7	0.168713
79	0.160622
78.5	0.154667
78.3	0.152188
78	0.148738
78	0.148738
77	0.137108
75.9	0.124467
75.5	0.120172
75	0.114608
75	0.114608
73.66	0.0991615
73.66	0.0991615
73.2	0.0936293
72	0.0798358
71.2	0.0705739
70.7	0.0649551
70	0.0574438
69.8	0.0554891
69	0.0467173
68.9	0.045223
68	0.0357704
66.25	0.0192634
66	0.0169221
64.3	0.00151719
64	-0.00117578
61.6	-0.0227941
61	-0.0277498
61	-0.0277498
61	-0.0277498
60.28	-0.0331584
60	-0.0353236
60	-0.0353236
59.33	-0.0399417
59.11	-0.0416063
59	-0.0423433
59	-0.0423433
59	-0.0423433
58	-0.048533
57.35	-0.0528468
57.1	-0.0546643
56	-0.0622133
56	-0.0622133
56	-0.0622133
55.2	-0.0675691
55	-0.0686933
55	-0.0686933
53.47	-0.0804249
53.4	-0.0812788
53.03	-0.0839646
53	-0.0841303
52.99	-0.0839078
52.71	-0.0858991
51.99	-0.0897538
51.39	-0.092773
51.2	-0.0940176
50.4	-0.097859
50	-0.0996454
49.98	-0.0998423
49.6	-0.100822
49.58	-0.10088
49.42	-0.101162
48.38	-0.104082
48	-0.105741
43.52	-0.117652
43.52	-0.117652
41.5	-0.122496
40.11	-0.125804
40.11	-0.125804
40	-0.126265
39.13	-0.127691
39	-0.128131
38.31	-0.129285
38.05	-0.129816
38.05	-0.129816
33	-0.134399
33	-0.134399
32	-0.135937
32	-0.135937
31.7	-0.135809
30	-0.136339
30	-0.136339
29	-0.136371
27	-0.136966
26	-0.137375
25	-0.137724
24	-0.137639
23.83	-0.137887
22	-0.137905
21.57	-0.137781
21	-0.137853
20.46	-0.138225
19.48	-0.138898
15	-0.142214
15	-0.142214
9.59	-0.146527
3.48	-0.151713
3.48	-0.151713
3.48	-0.151713
3.48	-0.151713
3.48	-0.151713
3.48	-0.151713
3.48	-0.151713
3.48	-0.151713
3.48	-0.151713
0	-0.140702
0	-0.140702
0	-0.140702
0	-0.140702
0	-0.140702
0	-0.140702
0	-0.140702
0	-0.140702
0	-0.140702
0	-0.140702
0	-0.140702
0	-0.140702
0	-0.140702
0	-0.140702
0	-0.140702
0	-0.140702
0	-0.140702
0	-0.140702
0	-0.140702
0	-0.140702
0	-0.140702
0	-0.140702
0	-0.140702
0	-0.140702
0	-0.140702
0	-0.140702
0	-0.140702
0	-0.140702
0	-0.140702
0	-0.140702
0	-0.140702
0	-0.140702
0	-0.140702
0	-0.140702
0	-0.140702
0	-0.140702
0	-0.140702
0	-0.140702
0	-0.140702
0	-0.140702
0	-0.140702
0	-0.140702
