# Supplementary material for: A Graphical Alternating Conditional Expectation to Predict Hydrate Phase Equilibrium Conditions for Sweet and Sour Natural Gases
Source: Hindawi journal article supplement (doi:10.1155/2019/2383961), 2019-01-01
Supplement: f1 [file 2383961.f1.zip › 2383961.f1/Fig4b Optimal transformation of variables as determined by ACE for(b) CO2.xlsx]

## Sheet: Fig 4b
CO2(mole%)	ϕ.2(CO2)
0	0.303226
0	0.303226
0	0.303226
0	0.303226
0	0.303226
0	0.303226
0	0.303226
5.5	0.269117
6.5	0.262915
7	0.259814
8	0.253613
8	0.253613
8	0.253613
8	0.253613
8.5	0.250512
9	0.247411
9	0.247411
9	0.247411
10	0.24121
10.4	0.238729
12	0.228806
12	0.228806
12.5	0.225706
13	0.222605
13	0.222605
13	0.222605
13	0.222605
13	0.222605
14	0.216403
14.1	0.215783
14.3	0.214543
14.4	0.213923
16.9	0.198419
17.9	0.192217
18.3	0.189736
18.54	0.188248
18.54	0.188248
19.71	0.180992
19.71	0.180992
20.09	0.178636
20.09	0.178636
20.3	0.177333
20.3	0.177333
21	0.173056
21.5	0.169961
21.7	0.168585
22	0.166675
22	0.166675
23	0.160235
24.1	0.153078
24.5	0.1507
25	0.147702
25	0.147702
26.34	0.139131
26.34	0.139131
26.8	0.135812
28	0.128069
28.8	0.122839
29.3	0.119639
30	0.115407
30.2	0.114426
31	0.109435
31.1	0.108553
32	0.10298
33.75	0.093552
34	0.0921894
35.7	0.0834888
36	0.0818168
38.4	0.0691561
39	0.0657584
39	0.0657584
39	0.0657584
39.72	0.0618375
40	0.0602988
40	0.0602988
40.67	0.0563652
40.89	0.0551627
41	0.0545101
41	0.0545101
41	0.0545101
42	0.0499799
42.65	0.0470324
42.9	0.0457383
44	0.0405945
44	0.0405945
44	0.0405945
44.8	0.036926
45	0.0361912
45	0.0361912
46.53	0.0282762
46.6	0.0276205
46.97	0.0259943
47	0.0259206
47.01	0.0259287
47.29	0.0245819
48.01	0.0215916
48.61	0.0191181
48.8	0.018145
49.6	0.0148475
50	0.0133811
50.02	0.0133296
50.4	0.0119337
50.42	0.0118747
50.58	0.0113098
51.62	0.00664711
52	0.00489207
56.48	-0.0160347
56.48	-0.0160347
58.5	-0.0256558
59.89	-0.03265
59.89	-0.03265
60	-0.0334318
60.87	-0.0378504
61	-0.0384546
61.69	-0.0419748
61.95	-0.0433748
61.95	-0.0433748
67	-0.0683817
67	-0.0683817
68	-0.0737181
68	-0.0737181
68.3	-0.0750323
70	-0.0829243
70	-0.0829243
71	-0.0874693
73	-0.0968806
74	-0.101689
75	-0.106448
76	-0.110862
76.17	-0.111659
78	-0.120202
78.43	-0.122137
79	-0.124906
79.54	-0.127656
80.52	-0.132861
85	-0.157826
85	-0.157826
90.41	-0.188702
96.52	-0.224466
96.52	-0.224466
96.52	-0.224466
96.52	-0.224466
96.52	-0.224466
96.52	-0.224466
96.52	-0.224466
96.52	-0.224466
96.52	-0.224466
100	-0.241177
100	-0.241177
100	-0.241177
100	-0.241177
100	-0.241177
100	-0.241177
100	-0.241177
100	-0.241177
100	-0.241177
100	-0.241177
100	-0.241177
100	-0.241177
100	-0.241177
100	-0.241177
100	-0.241177
100	-0.241177
100	-0.241177
100	-0.241177
100	-0.241177
100	-0.241177
100	-0.241177
100	-0.241177
100	-0.241177
100	-0.241177
100	-0.241177
100	-0.241177
100	-0.241177
100	-0.241177
100	-0.241177
100	-0.241177
100	-0.241177
100	-0.241177
100	-0.241177
100	-0.241177
100	-0.241177
100	-0.241177
100	-0.241177
100	-0.241177
100	-0.241177
100	-0.241177
100	-0.241177
100	-0.241177
