# Supplementary material for: A Graphical Alternating Conditional Expectation to Predict Hydrate Phase Equilibrium Conditions for Sweet and Sour Natural Gases
Source: Hindawi journal article supplement (doi:10.1155/2019/2383961), 2019-01-01
Supplement: f1 [file 2383961.f1.zip › 2383961.f1/Fig4c Optimal transformation of variables as determined by ACE for(c) temperature.xlsx]

## Sheet: Fig 4c
T(K)	ϕ.3(T)
273.16	-1.19348
276.16	-0.681374
279.6	-0.0558119
273.16	-1.19348
276.16	-0.681374
279.6	-0.0558119
280.3	0.0771692
283.8	1.11236
280.3	0.0771692
281	0.245853
277.8	-0.394007
280.2	0.0618898
283.2	0.894344
285.1	1.66323
278.4	-0.285171
280.3	0.0771692
275.8	-0.741799
287.2	2.91892
273.7	-1.10037
280.3	0.0771692
286.1	2.23297
286.1	2.23297
276.4	-0.640379
276.9	-0.553085
279.1	-0.15391
281.6	0.405523
284	1.18897
287.4	3.04367
274.6	-0.945931
280.3	0.0771692
280.3	0.0771692
280.3	0.0771692
280.3	0.0771692
280.3	0.0771692
280.3	0.0771692
275.36	-0.816364
275.36	-0.816364
281.46	0.36844
281.46	0.36844
278.06	-0.347106
278.06	-0.347106
280.3	0.0771692
280.3	0.0771692
285.2	1.71873
280.3	0.0771692
280.3	0.0771692
279.4	-0.0957054
283.4	0.963537
284.7	1.47066
280.3	0.0771692
280.3	0.0771692
273.8	-1.08316
287.6	3.16842
273.56	-1.12449
273.56	-1.12449
280.3	0.0771692
282.9	0.796024
280.3	0.0771692
280.3	0.0771692
278.9	-0.191763
280.3	0.0771692
280.3	0.0771692
280.3	0.0771692
280.9	0.220106
274.36	-0.986958
277	-0.53556
280.3	0.0771692
278.9	-0.191763
280.3	0.0771692
283.1	0.861706
285.1	1.66323
287.4	3.04367
276.76	-0.577545
280.7	0.169988
280.9	0.220106
272.66	-1.27971
282.56	0.692027
281.8	0.464356
285.5	1.87128
285.7	1.98473
276.9	-0.553085
279.26	-0.123122
280.3	0.0771692
273.7	-1.10037
285.1	1.66323
279.2	-0.134688
280.3	0.0771692
280.3	0.0771692
287.4	3.04367
273.5	-1.13485
274.2	-1.01438
275.2	-0.843605
278.5	-0.266655
275.6	-0.77553
275.7	-0.758612
276.8	-0.570598
278.4	-0.285171
280.3	0.0771692
278.7	-0.229202
275.6	-0.77553
279.5	-0.0758161
280.1	0.0439726
281.8	0.464356
283	0.828115
283.1	0.861706
283.8	1.11236
275.86	-0.731729
275.86	-0.731729
280.3	0.0771692
283.26	0.914233
283.26	0.914233
275.5	-0.792539
280.16	0.0545898
282.2	0.582019
273.56	-1.12449
277.96	-0.365284
277.96	-0.365284
282	0.521354
282	0.521354
278.2	-0.321824
280.2	0.0618898
280.3	0.0771692
276.4	-0.640379
276.4	-0.640379
279.6	-0.0558119
274.6	-0.945931
281.6	0.405523
279.6	-0.0558119
277.8	-0.394007
280.76	0.185398
275.9	-0.724977
278.26	-0.310899
273.7	-1.10037
276.56	-0.612572
283.56	1.02253
282.7	0.73377
282.7	0.73377
274.36	-0.986958
273.5	-1.13485
273.6	-1.1176
273.7	-1.10037
277.2	-0.500671
277.6	-0.429769
277.9	-0.376183
280.4	0.0985512
281.7	0.434843
282.3	0.613174
274.76	-0.9186
277.16	-0.507675
279.16	-0.142426
281.46	0.36844
274.76	-0.9186
277.16	-0.507675
279.16	-0.142426
281.46	0.36844
280.3	0.0771692
273.4	-1.15209
273.5	-1.13485
273.7	-1.10037
273.9	-1.06595
274.1	-1.03156
274.4	-0.98013
275	-0.877671
275.4	-0.809576
275.7	-0.758612
276	-0.708209
276.2	-0.674567
276.5	-0.622996
276.9	-0.553085
277.2	-0.500671
277.6	-0.429769
277.8	-0.394007
278	-0.357962
278.6	-0.247967
278.8	-0.210485
279.1	-0.15391
279.2	-0.134688
279.8	-0.0157896
280.1	0.0439726
280.2	0.0618898
280.5	0.121775
280.8	0.195434
281.1	0.272332
281.5	0.379102
281.9	0.492979
282	0.521354
282.3	0.613174
283.1	0.861706
283.2	0.894344
