# Supplementary material for: A Graphical Alternating Conditional Expectation to Predict Hydrate Phase Equilibrium Conditions for Sweet and Sour Natural Gases
Source: Hindawi journal article supplement (doi:10.1155/2019/2383961), 2019-01-01
Supplement: f1 [file 2383961.f1.zip › 2383961.f1/Fig4d Optimal transformation of variables as determined by ACE for(d) pressure.xlsx]

## Sheet: Fig 4d
P(kPa)	θ(P)
-0.503404	2600
-0.00790038	3500
0.728767	5000
-0.503404	2600
-0.00790038	3500
0.728767	5000
0.954274	5460
1.65174	6890
0.724973	4990
0.778667	5100
0.147533	3830
0.68596	4910
1.60785	6800
2.38822	8400
0.210858	3950
0.656693	4850
-0.231341	3100
3.53926	10760
-0.550615	2520
0.607813	4750
2.73816	9240
2.73816	9240
-0.177849	3200
-0.156219	3240
0.328161	4180
0.915258	5380
1.78831	7170
3.63193	10950
-0.510342	2590
0.524639	4580
0.549145	4630
0.519714	4570
0.485253	4500
0.455446	4440
0.421945	4370
-0.503404	2600
-0.503404	2600
0.728767	5000
0.728767	5000
-0.00790038	3500
-0.00790038	3500
0.406047	4340
0.421945	4370
2.07119	7750
0.391535	4310
0.396312	4320
0.215803	3960
1.32983	6230
1.44689	6470
0.347966	4220
0.338191	4200
-0.80285	2120
3.38319	10440
-0.880125	2000
-0.880125	2000
0.313113	4150
0.812818	5170
0.267576	4060
0.272957	4070
-0.038125	3460
0.226033	3980
0.236416	4000
0.241663	4010
0.357765	4240
-0.880125	2000
-0.368525	2840
0.163374	3860
-0.0541601	3430
0.116457	3770
0.939646	5430
1.67613	6940
3.06128	9780
-0.503404	2600
0.252054	4030
0.308264	4140
-1.28771	1500
0.728767	5000
0.470393	4470
1.65174	6890
1.70539	7000
-0.489417	2630
-0.00790038	3500
0.0860136	3710
-1.03131	1810
1.62736	6840
-0.241573	3080
0.0660395	3670
0.0512606	3640
2.96861	9590
-1.05494	1780
-1.0155	1830
-0.849073	2050
-0.293771	2980
-0.80285	2120
-0.749216	2200
-0.625237	2400
-0.376757	2825
0.0318333	3600
-0.362457	2851
-0.899469	1990
-0.123204	3301
-0.0862737	3370
0.440499	4410
0.730363	5001
0.764028	5070
0.861599	5270
-0.880125	2000
-0.880125	2000
-0.0808745	3380
0.728767	5000
0.728767	5000
-0.899469	1990
-0.00790038	3500
0.372341	4270
-1.28771	1500
-0.503404	2600
-0.503404	2600
0.294472	4120
0.294472	4120
-0.51566	2580
-0.134603	3280
-0.156219	3240
-0.831641	2080
-0.831641	2080
-0.283247	3000
-1.1506	1660
0.126716	3790
-0.298798	2970
-0.643808	2370
-0.00790038	3500
-0.976203	1880
-0.503404	2600
-1.31986	1450
-0.880125	2000
0.728767	5000
0.421945	4370
0.421945	4370
-1.28771	1500
-1.58003	1093.17
-1.53567	1155.28
-1.50905	1192.55
-0.922802	1950.31
-0.93191	1937.89
-0.854021	2043.48
-0.286674	2993.79
0.094368	3726.71
0.632868	4801.24
-1.28771	1500
-0.880125	2000
-0.503404	2600
-0.00790038	3500
-1.28771	1500
-0.880125	2000
-0.503404	2600
-0.00790038	3500
-0.262362	3040
-1.47945	1234
-1.47445	1241
-1.41517	1324
-1.42017	1317
-1.39549	1351
-1.36934	1386
-1.27121	1510
-1.18817	1613
-1.17137	1634
-1.1331	1682
-1.10511	1717
-1.00115	1848
-0.969087	1889
-0.922445	1951
-0.823073	2087
-0.787927	2137
-0.770759	2165
-0.660185	2344
-0.595201	2448
-0.545164	2530
-0.536958	2544
-0.431178	2730
-0.356855	2861
-0.322909	2923
-0.272705	3020
-0.200557	3158
-0.133511	3282
-0.030128	3475
0.0758104	3689
0.0758104	3689
0.167549	3868
0.469411	4468
0.486357	4502
