# Supplementary material for: A Graphical Alternating Conditional Expectation to Predict Hydrate Phase Equilibrium Conditions for Sweet and Sour Natural Gases
Source: Hindawi journal article supplement (doi:10.1155/2019/2383961), 2019-01-01
Supplement: f1 [file 2383961.f1.zip › 2383961.f1/Fig5 Optimal transformation of P versus the sum of the optimal transformation of P y(CO2) y(CH4) for CO2-CH4 system.xlsx]

## Sheet: Fig 5
Sum tranformed indepent variables	θ(P)
-0.482066	-0.503404
0.0300438	-0.00790038
0.655606	0.728767
-0.482066	-0.503404
0.0300438	-0.00790038
0.655606	0.728767
0.788587	0.954274
1.72479	1.65174
0.671597	0.724973
0.831281	0.778667
0.173422	0.147533
0.629319	0.68596
1.46177	1.60785
2.23066	2.38822
0.273259	0.210858
0.6266	0.656693
-0.192368	-0.231341
3.46835	3.53926
-0.568934	-0.550615
0.601402	0.607813
2.72841	2.73816
2.72841	2.73816
-0.153943	-0.177849
-0.0756484	-0.156219
0.323527	0.328161
0.882961	0.915258
1.6664	1.78831
3.52111	3.63193
-0.486493	-0.510342
0.534808	0.524639
0.531208	0.549145
0.529408	0.519714
0.484412	0.485253
0.466414	0.455446
0.459214	0.421945
-0.438638	-0.503404
-0.438638	-0.503404
0.725107	0.728767
0.725107	0.728767
0.00272178	-0.00790038
0.00272178	-0.00790038
0.423215	0.406047
0.423215	0.421945
2.0524	2.07119
0.401797	0.391535
0.397943	0.396312
0.219707	0.215803
1.27895	1.32983
1.768	1.44689
0.354714	0.347966
0.348041	0.338191
-0.820847	-0.80285
3.43073	3.38319
-0.886201	-0.880125
-0.886201	-0.880125
0.306611	0.313113
1.00393	0.812818
0.270582	0.267576
0.261764	0.272957
-0.0189123	-0.038125
0.247084	0.226033
0.233322	0.236416
0.230945	0.241663
0.358856	0.357765
-0.874143	-0.880125
-0.426448	-0.368525
0.162175	0.163374
-0.111122	-0.0541601
0.123531	0.116457
0.899715	0.939646
1.70124	1.67613
3.08168	3.06128
-0.548866	-0.503404
0.194964	0.252054
0.245081	0.308264
-1.26329	-1.28771
0.705583	0.728767
0.476523	0.470393
1.88345	1.65174
1.9969	1.70539
-0.551639	-0.489417
-0.128937	-0.00790038
0.0682433	0.0860136
-1.12199	-1.03131
1.64162	1.62736
-0.156307	-0.241573
0.0465262	0.0660395
0.0446672	0.0512606
3.01117	2.96861
-1.187	-1.05494
-1.06804	-1.0155
-0.901575	-0.849073
-0.324864	-0.293771
-0.833509	-0.80285
-0.819929	-0.749216
-0.638761	-0.625237
-0.358826	-0.376757
0.00129666	0.0318333
-0.312213	-0.362457
-0.861794	-0.899469
-0.162329	-0.123204
-0.0449156	-0.0862737
0.375351	0.440499
0.738263	0.730363
0.764271	0.764028
1.01151	0.861599
-0.865415	-0.880125
-0.865415	-0.880125
-0.0709828	-0.0808745
0.755779	0.728767
0.755779	0.728767
-0.952235	-0.899469
-0.110951	-0.00790038
0.415433	0.372341
-1.29575	-1.28771
-0.538474	-0.503404
-0.538474	-0.503404
0.318574	0.294472
0.318574	0.294472
-0.531479	-0.51566
-0.147765	-0.134603
-0.133672	-0.156219
-0.859642	-0.831641
-0.859642	-0.831641
-0.279652	-0.283247
-1.17978	-1.1506
0.166459	0.126716
-0.299983	-0.298798
-0.642509	-0.643808
-0.064148	-0.00790038
-0.983084	-0.976203
-0.570818	-0.503404
-1.36313	-1.31986
-0.878454	-0.880125
0.75077	0.728767
0.43373	0.421945
0.43373	0.421945
-1.32219	-1.28771
-1.51103	-1.58003
-1.49378	-1.53567
-1.47655	-1.50905
-0.876851	-0.922802
-0.805949	-0.93191
-0.752363	-0.854021
-0.277629	-0.286674
0.0586629	0.094368
0.236994	0.632868
-1.30048	-1.28771
-0.889554	-0.880125
-0.524305	-0.503404
-0.0134389	-0.00790038
-1.30048	-1.28771
-0.889554	-0.880125
-0.524305	-0.503404
-0.0134389	-0.00790038
-0.30471	-0.262362
-1.53397	-1.47945
-1.51673	-1.47445
-1.48225	-1.41517
-1.44783	-1.42017
-1.41344	-1.39549
-1.36201	-1.36934
-1.25955	-1.27121
-1.19146	-1.18817
-1.14049	-1.17137
-1.09009	-1.1331
-1.05645	-1.10511
-1.00487	-1.00115
-0.934965	-0.969087
-0.88255	-0.922445
-0.811649	-0.823073
-0.775886	-0.787927
-0.739841	-0.770759
-0.629846	-0.660185
-0.592364	-0.595201
-0.535789	-0.545164
-0.516567	-0.536958
-0.397669	-0.431178
-0.337906	-0.356855
-0.319989	-0.322909
-0.260104	-0.272705
-0.186445	-0.200557
-0.109547	-0.133511
-0.00277664	-0.030128
0.1111	0.0758104
0.139475	0.0758104
0.231295	0.167549
0.479827	0.469411
0.512465	0.486357
