# Supplementary material for: A Graphical Alternating Conditional Expectation to Predict Hydrate Phase Equilibrium Conditions for Sweet and Sour Natural Gases
Source: Hindawi journal article supplement (doi:10.1155/2019/2383961), 2019-01-01
Supplement: f1 [file 2383961.f1.zip › 2383961.f1/Fig6a Optimal transformation of variables as determined by ACE for (a) Ln(CH4).xlsx]

## Sheet: Fig 6a
Ln(CH4)(mole%)	ϕ..1(LnCH4)
4.47335	-3.10422
4.47335	-3.10422
4.47335	-3.10422
4.47335	-3.10422
4.47335	-3.10422
4.47335	-3.10422
4.47335	-3.10422
4.47335	-3.10422
4.47335	-3.10422
4.41219	-1.25416
4.41219	-1.25416
4.41219	-1.25416
4.41219	-1.25416
4.41219	-1.25416
4.41219	-1.25416
4.41219	-1.25416
4.41219	-1.25416
4.41219	-1.25416
4.41219	-1.25416
4.41219	-1.25416
4.41219	-1.25416
4.41776	-1.51587
4.41776	-1.51587
4.41776	-1.51587
4.41776	-1.51587
4.41776	-1.51587
4.41776	-1.51587
4.41776	-1.51587
4.41776	-1.51587
4.41776	-1.51587
4.35298	0.203857
4.35298	0.203857
4.35298	0.203857
4.35298	0.203857
4.35298	0.203857
4.35298	0.203857
4.35298	0.203857
4.35298	0.203857
4.35298	0.203857
4.32387	1.01835
4.32387	1.01835
4.32387	1.01835
4.32387	1.01835
4.32387	1.01835
4.32387	1.01835
4.32387	1.01835
4.32387	1.01835
4.32387	1.01835
4.32387	1.01835
4.32387	1.01835
4.1954	4.43171
4.1954	4.43171
4.1954	4.43171
4.1954	4.43171
4.1954	4.43171
4.1954	4.43171
4.1954	4.43171
4.1954	4.43171
4.1954	4.43171
4.3631	-0.0884269
4.38577	-0.736115
4.39445	-0.97786
4.40672	-1.25881
4.40672	-1.25881
4.40672	-1.25881
4.40672	-1.25881
4.40672	-1.25881
4.39445	-0.97786
4.39445	-0.97786
4.38203	-0.630147
4.38203	-0.630147
4.38203	-0.630147
4.40183	-1.14987
4.22829	3.56991
4.24707	3.07622
4.25561	2.85004
4.2697	2.47375
4.28359	2.093
4.28359	2.093
4.28359	2.093
4.27667	2.28602
4.27667	2.28602
4.27667	2.28602
4.27667	2.28602
4.26409	2.62392
4.25986	2.73654
4.28359	2.093
4.2312	3.49334
4.27667	2.28602
4.27667	2.28602
4.27667	2.28602
4.27667	2.28602
4.27667	2.28602
4.27667	2.28602
4.27667	2.28602
4.27667	2.28602
4.27667	2.28602
4.27667	2.28602
4.39445	-0.97786
4.39445	-0.97786
4.39445	-0.97786
4.39445	-0.97786
4.39445	-0.97786
4.40672	-1.25881
4.40672	-1.25881
4.40672	-1.25881
4.40672	-1.25881
4.40672	-1.25881
4.47961	-3.2884
4.47961	-3.2884
4.41522	-1.39327
4.41522	-1.39327
4.41522	-1.39327
4.49536	-3.74547
4.49536	-3.74547
4.49536	-3.74547
4.56017	-5.61115
4.56017	-5.61115
