# Supplementary material for: A Graphical Alternating Conditional Expectation to Predict Hydrate Phase Equilibrium Conditions for Sweet and Sour Natural Gases
Source: Hindawi journal article supplement (doi:10.1155/2019/2383961), 2019-01-01
Supplement: f1 [file 2383961.f1.zip › 2383961.f1/Fig6b Optimal transformation of variables as determined by ACE for(b) CO2 mole percent fraction.xlsx]

## Sheet: Fig 6b
CO2(mole%)	ϕ..2(CO2)
7.4	1.18149
7.4	1.18149
7.4	1.18149
7.4	1.18149
7.4	1.18149
7.4	1.18149
7.4	1.18149
7.4	1.18149
7.4	1.18149
10.77	-0.165087
10.77	-0.165087
10.77	-0.165087
10.77	-0.165087
10.77	-0.165087
10.77	-0.165087
10.77	-0.165087
10.77	-0.165087
10.77	-0.165087
10.77	-0.165087
10.77	-0.165087
10.77	-0.165087
7.16	1.25733
7.16	1.25733
7.16	1.25733
7.16	1.25733
7.16	1.25733
7.16	1.25733
7.16	1.25733
7.16	1.25733
7.16	1.25733
7.31	1.2127
7.31	1.2127
7.31	1.2127
7.31	1.2127
7.31	1.2127
7.31	1.2127
7.31	1.2127
7.31	1.2127
7.31	1.2127
6.81	1.38732
6.81	1.38732
6.81	1.38732
6.81	1.38732
6.81	1.38732
6.81	1.38732
6.81	1.38732
6.81	1.38732
6.81	1.38732
6.81	1.38732
6.81	1.38732
7	1.31564
7	1.31564
7	1.31564
7	1.31564
7	1.31564
7	1.31564
7	1.31564
7	1.31564
7	1.31564
13.9	-1.29784
13	-0.979935
13	-0.979935
12.6	-0.838101
12.6	-0.838101
12.6	-0.838101
12.5	-0.80191
12.6	-0.838101
11.8	-0.53485
11.8	-0.53485
12	-0.614102
12	-0.614102
12	-0.614102
11.1	-0.290408
24.9	-5.2851
24.1	-4.97332
23.5	-4.73949
22.8	-4.46668
22	-4.15796
22	-4.15796
22	-4.15796
22.3	-4.27159
12	-0.614102
12	-0.614102
12	-0.614102
11.9	-0.571222
12.1	-0.653413
11.9	-0.571222
13.6	-1.19177
22.3	-4.27159
22.3	-4.27159
22.3	-4.27159
22.3	-4.27159
22.3	-4.27159
12	-0.614102
12	-0.614102
12	-0.614102
12	-0.614102
12	-0.614102
11.5	-0.440038
11.5	-0.440038
11.5	-0.440038
11.5	-0.440038
11.5	-0.440038
12.6	-0.838101
12.6	-0.838101
12.6	-0.838101
12.6	-0.838101
12.6	-0.838101
7.3	1.21594
7.3	1.21594
8.3	0.823683
8.3	0.823683
8.3	0.823683
0	3.91735
0	3.91735
0	3.91735
0	3.91735
0	3.91735
