# Supplementary material for: A Graphical Alternating Conditional Expectation to Predict Hydrate Phase Equilibrium Conditions for Sweet and Sour Natural Gases
Source: Hindawi journal article supplement (doi:10.1155/2019/2383961), 2019-01-01
Supplement: f1 [file 2383961.f1.zip › 2383961.f1/Fig6c Optimal transformation of variables as determined by ACE for(c) H2S mole percent fraction.xlsx]

## Sheet: Fig 6c
H2S(mole%)	ϕ..3(H2S)
4.95	2.67969
4.95	2.67969
4.95	2.67969
4.95	2.67969
4.95	2.67969
4.95	2.67969
4.95	2.67969
4.95	2.67969
4.95	2.67969
6.78	1.88524
6.78	1.88524
6.78	1.88524
6.78	1.88524
6.78	1.88524
6.78	1.88524
6.78	1.88524
6.78	1.88524
6.78	1.88524
6.78	1.88524
6.78	1.88524
6.78	1.88524
9.93	0.427237
9.93	0.427237
9.93	0.427237
9.93	0.427237
9.93	0.427237
9.93	0.427237
9.93	0.427237
9.93	0.427237
9.93	0.427237
14.98	-1.8299
14.98	-1.8299
14.98	-1.8299
14.98	-1.8299
14.98	-1.8299
14.98	-1.8299
14.98	-1.8299
14.98	-1.8299
14.98	-1.8299
17.71	-3.0529
17.71	-3.0529
17.71	-3.0529
17.71	-3.0529
17.71	-3.0529
17.71	-3.0529
17.71	-3.0529
17.71	-3.0529
17.71	-3.0529
17.71	-3.0529
17.71	-3.0529
26.62	-7.03996
26.62	-7.03996
26.62	-7.03996
26.62	-7.03996
26.62	-7.03996
26.62	-7.03996
26.62	-7.03996
26.62	-7.03996
26.62	-7.03996
7.6	1.45211
6.7	1.93117
6	2.246
5.4	2.50396
5.4	2.50396
5.4	2.50396
5.5	2.45538
5.4	2.50396
7.2	1.66342
7.2	1.66342
8	1.27164
8	1.27164
8	1.27164
7.3	1.60961
6.5	2.02447
6	2.246
6	2.246
5.7	2.3678
5.5	2.45538
5.5	2.45538
5.5	2.45538
5.7	2.3678
16	-2.28262
16	-2.28262
16	-2.28262
17	-2.73029
17.1	-2.77577
15.6	-2.10535
17.6	-3.00115
5.7	2.3678
5.7	2.3678
5.7	2.3678
5.7	2.3678
5.7	2.3678
16	-2.28262
16	-2.28262
16	-2.28262
16	-2.28262
16	-2.28262
7.5	1.49959
7.5	1.49959
7.5	1.49959
7.5	1.49959
7.5	1.49959
5.4	2.50396
5.4	2.50396
5.4	2.50396
5.4	2.50396
5.4	2.50396
4.5	2.79246
4.5	2.79246
9	0.836631
9	0.836631
9	0.836631
10.4	0.214176
10.4	0.214176
10.4	0.214176
4.4	2.8174
4.4	2.8174
