# Supplementary material for: A Graphical Alternating Conditional Expectation to Predict Hydrate Phase Equilibrium Conditions for Sweet and Sour Natural Gases
Source: Hindawi journal article supplement (doi:10.1155/2019/2383961), 2019-01-01
Supplement: f1 [file 2383961.f1.zip › 2383961.f1/Fig6d Optimal transformation of variables as determined by ACE for(d) temperature.xlsx]

## Sheet: Fig 6d
T(K)	ϕ..4(T)
274.2	-2.0178
277.2	-1.56606
280.2	-1.11219
282.2	-0.806204
284.2	-0.479616
286.2	-0.124677
288.2	0.239964
289.2	0.421572
290.2	0.61904
276.2	-1.71658
278.2	-1.41541
280.2	-1.11219
282.2	-0.806204
284.2	-0.479616
286.2	-0.124677
287.2	0.0564805
288.2	0.239964
289.2	0.421572
290.2	0.61904
290.9	0.755916
291.2	0.81231
278.2	-1.41541
282.2	-0.806204
284.2	-0.479616
286.2	-0.124677
288.2	0.239964
289.7	0.519791
291.2	0.81231
292.2	1.00256
293.2	1.19319
277.2	-1.56606
280.2	-1.11219
283.2	-0.646908
286.2	-0.124677
289.2	0.421572
291.2	0.81231
293.2	1.19319
294.7	1.50297
295.7	1.71813
282.2	-0.806204
284.2	-0.479616
286.2	-0.124677
288.2	0.239964
290.2	0.61904
292.2	1.00256
294.2	1.39852
295.2	1.6097
295.8	1.74002
296.6	1.91619
297.2	2.04939
281.2	-0.959156
284.2	-0.479616
287.2	0.0564805
290.2	0.61904
293.2	1.19319
295.2	1.6097
296.7	1.93826
298.2	2.27537
299.7	2.61443
281	-0.989615
282.5	-0.758122
286.6	-0.0526078
287.3	0.0742295
289.4	0.460873
290.8	0.736647
292.2	1.00256
292.9	1.1378
284.2	-0.479616
285.4	-0.268959
289.1	0.402398
290.4	0.658988
292	0.964007
293	1.15636
279.2	-1.26404
282	-0.837256
284	-0.513574
286.4	-0.088676
288.4	0.275358
290	0.578884
290.9	0.755916
293	1.15636
291.5	0.8689
293.3	1.21166
294.7	1.50297
295.4	1.65307
296.5	1.89392
297.6	2.13974
297.6	2.13974
277.6	-1.5065
280.4	-1.08064
283.2	-0.646908
285.9	-0.180502
288.7	0.328141
277.6	-1.5065
280.4	-1.08064
283.2	-0.646908
285.9	-0.180502
288.7	0.328141
277.6	-1.5065
280.4	-1.08064
283.2	-0.646908
285.9	-0.180502
288.7	0.328141
277.6	-1.5065
280.4	-1.08064
283.2	-0.646908
285.9	-0.180502
288.7	0.328141
275.9	-1.76183
276.8	-1.62606
274.2	-2.0178
277.4	-1.53626
280.6	-1.0501
273.9	-2.06295
275.4	-1.83716
279.6	-1.20357
274.2	-2.0178
276.6	-1.65626
