# Supplementary material for: A Graphical Alternating Conditional Expectation to Predict Hydrate Phase Equilibrium Conditions for Sweet and Sour Natural Gases
Source: Hindawi journal article supplement (doi:10.1155/2019/2383961), 2019-01-01
Supplement: f1 [file 2383961.f1.zip › 2383961.f1/Fig6e Optimal transformation of variables as determined by ACE for(e) pressure.xlsx]

## Sheet: Fig 6e
P(kPa)	θ(P)
-1.45555	1044
-0.864101	1580
-0.342548	2352
0.0205498	3126
0.355052	3964
0.728297	5121
1.02445	6358
1.20893	7212
1.37737	8220
-1.35978	1114
-1.05077	1385
-0.678831	1815
-0.395694	2265
0.0138572	3110
0.394669	4065
0.565921	4570
0.665142	4890
0.971074	6110
1.13684	6862
1.28693	7650
1.34545	8024
-1.25614	1192
-0.596294	1932
-0.285241	2460
0.0972846	3303
0.446691	4212
0.670474	4930
0.917004	5868
1.08381	6630
1.32827	7916
-2.10912	646
-1.49007	1020
-1.00848	1428
-0.505313	2080
0.0380624	3164
0.396241	4070
0.768948	5270
1.09879	6698
1.32703	7910
-1.59923	950
-1.19305	1244
-0.78926	1670
-0.332986	2368
0.000462392	3080
0.372616	4008
0.782305	5314
1.01418	6310
1.14019	6880
1.31414	7825
1.43014	8680
-2.21768	582
-1.87163	786
-1.29913	1160
-0.698934	1788
-0.178566	2688
0.335557	3910
0.703929	5030
1.0684	6562
1.35472	8080
-0.784592	1675.86
-0.389169	2275.86
0.320478	3868.97
0.562391	4558.62
0.921687	5889.65
1.14133	6882.76
1.42817	8655.17
1.50576	9634.48
-0.614611	1903.45
-0.143402	2765.52
0.462273	4255.17
0.6904	4979.31
0.933267	5944.83
1.16367	6986.21
-0.961518	1475.86
-0.532255	2034.48
-0.141675	2772.41
0.273212	3744.83
0.683102	4931.03
0.988103	6186.21
1.27016	7551.72
1.63199	11227.6
0.109584	3331.03
0.508834	4393.1
0.729939	5124.14
1.05405	6496.55
1.24074	7386.21
1.40222	8406.9
1.34306	8006.9
-1.19882	1241.38
-0.726914	1751.72
-0.2736	2482.76
0.225324	3620.69
0.77149	5275.86
-1.91807	758.621
-1.57657	965.517
-1.159	1275.86
-0.748135	1724.14
-0.327721	2379.31
-1.46892	1034.48
-1.00155	1434.48
-0.553482	2000
-0.114611	2827.59
0.369543	4000
-1.28225	1172.41
-0.800707	1655.17
-0.308522	2413.79
0.18448	3517.24
0.763188	5241.38
-0.986659	1450
-0.758961	1710
-1.71244	880
-1.22197	1220
-0.796967	1660
-1.6471	920
-1.43211	1060
-0.82875	1620
-0.882073	1560
-0.590641	1940
