# Supplementary material for: A Graphical Alternating Conditional Expectation to Predict Hydrate Phase Equilibrium Conditions for Sweet and Sour Natural Gases
Source: Hindawi journal article supplement (doi:10.1155/2019/2383961), 2019-01-01
Supplement: f1 [file 2383961.f1.zip › 2383961.f1/Fig7 Optimal transformation of P versus the sum of the optimal transformation of independent variables for H2S-CO2-CH4 system.xlsx]

## Sheet: Fig 7
Sum tranformed indepent variables	θ(P)
-1.45555	-1.26084
-0.864101	-0.809098
-0.342548	-0.355228
0.0205498	-0.0492418
0.355052	0.277346
0.728297	0.632285
1.02445	0.996926
1.20893	1.17853
1.37737	1.376
-1.35978	-1.25059
-1.05077	-0.949422
-0.678831	-0.646198
-0.395694	-0.340212
0.0138572	-0.013624
0.394669	0.341315
0.565921	0.522472
0.665142	0.705956
0.971074	0.887563
1.13684	1.08503
1.28693	1.22191
1.34545	1.2783
-1.25614	-1.24672
-0.596294	-0.637509
-0.285241	-0.310921
0.0972846	0.0440182
0.446691	0.408659
0.670474	0.688486
0.917004	0.981005
1.08381	1.17126
1.32827	1.36189
-2.10912	-1.97941
-1.49007	-1.52554
-1.00848	-1.06026
-0.505313	-0.538026
0.0380624	0.00822276
0.396241	0.398961
0.768948	0.779843
1.09879	1.08962
1.32703	1.30478
-1.59923	-1.45344
-1.19305	-1.12685
-0.78926	-0.771912
-0.332986	-0.407272
0.000462392	-0.0281952
0.372616	0.355328
0.782305	0.751287
1.01418	0.96247
1.14019	1.09278
1.31414	1.26895
1.43014	1.40215
-2.21768	-2.25177
-1.87163	-1.77223
-1.29913	-1.23613
-0.698934	-0.673573
-0.178566	-0.0994207
0.335557	0.317092
0.703929	0.645648
1.0684	0.982755
1.35472	1.32182
-0.784592	-0.923767
-0.389169	-0.543003
0.320478	0.235599
0.562391	0.481274
0.921687	0.867918
1.14133	1.14369
1.42817	1.39722
1.50576	1.54485
-0.614611	-0.328906
-0.143402	-0.118249
0.462273	0.429786
0.6904	0.686376
0.933267	0.991395
1.16367	1.3257
-0.961518	-0.954764
-0.532255	-0.488358
-0.141675	-0.157021
0.273212	0.286202
0.683102	0.665779
0.988103	0.969305
1.27016	1.14634
1.63199	1.5386
0.109584	0.258202
0.508834	0.600963
0.729939	0.892275
1.05405	0.97548
1.24074	1.20128
1.40222	1.55617
1.34306	1.44017
-1.19882	-1.12426
-0.726914	-0.698402
-0.2736	-0.264667
0.225324	0.201739
0.77149	0.710382
-1.91807	-2.11719
-1.57657	-1.69134
-1.159	-1.25761
-0.748135	-0.7912
-0.327721	-0.282557
-1.46892	-1.42481
-1.00155	-0.998953
-0.553482	-0.565219
-0.114611	-0.0988123
0.369543	0.409831
-1.28225	-1.09945
-0.800707	-0.673597
-0.308522	-0.239863
0.18448	0.226543
0.763188	0.735186
-0.986659	-1.04183
-0.758961	-0.906063
-1.71244	-1.75076
-1.22197	-1.26922
-0.796967	-0.78306
-1.6471	-1.6769
-1.43211	-1.45111
-0.82875	-0.817511
-0.882073	-0.894206
-0.590641	-0.532661
