# Supplementary material for: A Graphical Alternating Conditional Expectation to Predict Hydrate Phase Equilibrium Conditions for Sweet and Sour Natural Gases
Source: Hindawi journal article supplement (doi:10.1155/2019/2383961), 2019-01-01
Supplement: f1 [file 2383961.f1.zip › 2383961.f1/Fig8 Comparison of experimental data with ACE testing outputs.xlsx]

## Sheet: Fig 8
Texp(K)	Tpre(K)
273.9	273.8
274	274.02
274.3	274.24
274.4	274.24
274.7	274.67
275	274.88
275.2	275.08
275.5	275.28
275.7	275.48
275.9	275.67
276	275.86
276.2	275.86
276.4	276.23
276.6	276.41
276.9	276.59
277	276.76
277.3	276.93
277.4	277.26
277.8	277.59
278.1	277.9
278.4	278.05
278.6	278.35
279	278.78
279.2	279.06
279.5	279.33
279.7	279.59
279.9	279.84
280	279.97
280	279.97
280.1	280.09
280.3	280.21
280.6	280.57
280.8	280.91
281	281.02
280.7	280.68
281	281.13
281.2	281.23
281.3	281.34
281.6	281.55
281.8	281.75
282.1	282.14
282.2	282.33
282.4	282.43
282.7	282.7
282.9	282.88
283.1	283.05
283.4	283.38
283.7	283.71
283.8	283.86
284.1	284.09
284.3	284.31
284.6	284.59
284.8	284.86
285.2	285.19
285.6	285.62
285.7	285.68
286	286.03
286.2	286.19
286.4	286.51
286.6	286.56
286.7	286.62
287	286.96
287.2	287.2
287.4	287.38
287.9	287.81
288.2	288.09
288.5	288.36
288.8	288.58
289	288.76
289.3	289.03
289.6	289.32
289.9	289.5
290.2	289.78
290.6	290.08
290.9	290.34
291.2	290.58
291.5	290.78
291.9	291.07
274	274.74
274.1	274.74
274.2	274.74
274.4	274.74
274.7	274.74
275.3	275.19
275.6	275.19
275.9	275.62
276.1	276.03
276.4	276.43
276.6	276.43
276.8	276.81
277.1	276.81
277.4	277.87
277.6	277.53
277.8	277.87
278.2	278.19
278.5	278.51
278.7	278.51
278.9	278.81
279.1	279.11
279.4	279.39
279.7	279.67
280	279.93
280.1	279.93
280.3	280.44
280.6	280.69
281	280.93
281.2	281.16
281.5	281.38
281.8	281.81
282	282.01
282.1	282.01
282.4	282.21
282.5	282.6
282.8	282.78
283.1	283.14
283.3	283.31
283.4	283.31
283.6	283.65
283.9	283.81
284.2	284.27
284.4	284.27
284.6	284.56
284.7	284.7
284.9	284.84
285.1	285.1
285.5	285.48
285.8	285.73
286	285.96
286.1	286.18
286.4	286.4
286.5	286.5
286.8	286.71
287.1	287
287.2	287.1
287.6	287.37
287.7	287.55
288.1	287.89
288.2	288.05
288.5	288.35
288.7	288.57
289.1	288.85
289.4	289.24
289.6	289.42
289.9	289.66
290.1	289.77
290.2	289.88
290.3	289.99
290.5	290.15
290.6	290.25
290.7	290.4
290.9	290.54
291.2	290.77
291.7	291.15
291.9	291.43
292.2	291.62
292.3	291.79
292.7	292.1
293	292.44
293.3	292.69
293.6	292.88
293.6	292.99
293.9	293.21
294.1	293.47
294.2	293.6
274.2	274.73
274.4	274.73
274.6	274.73
274.6	274.73
274.8	275.36
274.9	275.36
275.1	275.36
275.3	275.95
275.5	275.95
275.7	275.95
275.9	276.5
276.2	276.5
276.3	276.5
276.3	276.5
276.6	277.03
276.8	277.03
277	277.03
277.2	277.52
277.5	277.99
277.7	277.99
277.9	277.99
278.2	278.44
278.4	278.44
278.7	278.87
278.8	278.87
279	278.87
279.2	279.27
279.5	279.66
279.5	279.27
279.7	279.66
279.8	280.02
280	280.02
280.2	280.02
280.5	280.38
280.6	280.38
280.8	280.72
280.9	280.72
281.1	281.04
281.2	281.35
281.5	281.65
281.9	281.94
282.2	282.48
282.5	282.48
282.9	282.74
283.2	283.23
283.6	283.46
283.9	283.9
284.2	284.11
284.5	284.52
285	285.08
285.5	285.42
285.7	285.59
286	286.07
286.3	286.36
286.5	286.64
287	287.04
287.5	287.42
287.9	287.87
288.2	288.19
288.7	288.59
289.2	289.05
289.7	289.46
289.9	289.7
290.2	289.92
290.5	290.26
290.8	290.58
291.3	291.05
291.5	291.32
291.7	291.47
291.9	291.72
292.2	291.99
292.5	292.32
292.6	292.48
292.8	292.67
293	292.85
293.3	293.12
293.4	293.22
293.6	293.35
293.8	293.59
294.1	293.73
273.2	273.89
273.5	273.89
273.9	273.89
274.1	274.68
274.5	274.68
274.6	274.68
274.7	274.68
274.8	275.41
275	274.68
275.2	275.41
275.4	275.41
275.7	276.09
275.8	276.09
276.2	276.09
276.4	276.73
276.6	276.73
276.7	276.73
277.1	277.32
277.4	277.87
277.6	277.87
277.8	277.87
278.1	277.87
278.2	277.87
278.4	278.39
278.7	278.88
278.8	278.88
278.9	278.88
279	278.88
279.3	279.35
279.5	279.35
279.7	279.79
279.8	279.79
280	280.2
280.3	280.2
280.6	280.6
280.8	280.6
281	280.98
281.2	280.98
281.4	281.34
281.7	281.68
281.9	281.68
282	282.01
282.5	282.32
282.6	282.62
282.9	282.91
283.3	283.19
283.6	283.46
283.8	283.71
284	283.71
284.3	284.2
284.6	284.65
284.9	284.87
285.7	285.66
286.2	286.02
286.4	286.36
286.8	286.68
287.1	287.13
287.4	287.27
287.6	287.55
287.9	287.81
288.3	288.17
288.6	288.51
288.9	288.83
289.2	289.23
289.4	289.51
289.7	289.77
289.9	290.09
290.2	290.4
290.6	290.88
290.8	291.13
291.2	291.48
291.3	291.65
291.6	291.86
291.8	292.06
292.2	292.39
292.3	292.56
292.7	292.77
292.9	292.93
293.1	293.15
293.4	293.4
293.8	293.7
294.1	293.98
294.4	294.12
294.5	294.26
294.7	294.43
294.9	294.71
295.4	295.07
295.6	295.39
295.9	295.61
296.2	295.87
296.4	296.07
296.6	296.21
274.3	274.97
274.6	274.96
274.7	274.95
274.8	275.75
275	274.94
275.2	275.74
275.4	275.73
275.8	276.46
276.1	276.46
276.2	276.45
276.4	276.45
276.6	276.44
276.8	277.12
277	277.12
277.4	277.11
277.7	277.74
278.1	278.32
278.3	278.32
278.5	278.31
278.7	278.31
278.8	278.86
279	278.86
279.2	278.85
279.4	279.37
279.8	279.86
280.1	279.85
280.3	280.31
280.6	280.31
280.8	280.74
281	280.74
281.2	280.73
281.3	281.15
281.7	281.14
282	281.91
282.3	282.26
282.6	282.25
282.8	282.59
283	282.91
283.4	283.22
283.7	283.51
284	283.79
284.4	284.06
284.6	284.32
285.1	284.81
285.6	285.27
286.3	286.09
286.6	286.28
286.8	286.81
287	286.97
287.5	287.45
287.7	287.74
287.9	288.01
288.2	288.28
288.5	288.76
288.7	288.99
289	289.31
289.4	289.71
289.7	290.07
290.1	290.32
290.2	290.48
290.7	290.93
290.9	291.21
291.2	291.47
291.5	291.77
291.8	292.04
291.9	292.15
292.2	292.45
292.5	292.73
292.8	292.99
293	293.2
293.3	293.47
293.5	293.68
293.8	293.89
294.1	294.18
294.3	294.33
294.5	294.57
294.8	294.79
295	295.03
295.4	295.31
295.5	295.48
295.8	295.71
296.2	296.02
296.4	296.26
273.5	273.24
273.6	273.24
273.9	273.24
274.3	274.32
274.8	274.32
275.1	274.32
275.4	275.3
275.8	275.3
276.1	276.18
276.4	276.18
276.7	276.18
276.9	276.18
277.2	276.98
277.6	276.98
277.9	276.98
278.1	277.71
278.4	277.71
278.6	277.71
279	278.39
279.4	278.39
279.8	279.01
280.3	279.59
280.5	279.59
280.8	280.13
281.1	280.64
281.3	280.64
281.8	281.11
282.5	281.98
283	282.37
283.4	282.75
283.9	283.44
284.3	283.77
284.5	284.08
285	284.65
285.2	284.92
285.8	285.43
286.4	286.11
286.7	286.32
287	286.72
287.4	287.1
287.7	287.45
288	287.61
288.4	288.08
288.6	288.23
288.9	288.51
289.1	288.65
289.4	289.15
289.7	289.39
290.2	290.02
290.5	290.4
290.8	290.83
291	291.07
291.3	291.5
291.6	291.9
291.8	292.14
292	292.52
292.5	293.11
292.6	293.24
292.9	293.58
293.3	294.07
293.5	294.34
293.8	294.6
294	294.85
294.4	295.19
294.9	295.67
295.3	296
296	296.61
296.4	296.95
296.8	297.25
297	297.38
297.4	297.68
297.6	297.87
297.8	298.04
274.3	276.37
278.4	280.32
280.5	282.23
281.5	283.65
283.1	284.74
284.5	286.02
285.5	286.95
285.9	287.36
286.6	287.99
287.5	289.04
288	289.23
289	290.16
289.1	290.24
289.4	290.51
290	290.91
290.1	291.04
290.2	291.13
290.6	291.51
291.5	292.2
290.1	288.6
290.9	289.36
291.6	290.39
292.6	291.59
293.1	291.95
293.7	292.89
294	293.36
294.2	293.61
294.5	294
294.9	294.54
295.3	295.04
295.6	295.35
295.9	295.69
295.9	295.68
296.1	295.99
296.3	296.07
296.6	296.46
296.8	296.72
297.1	297.01
287.1	286.07
288.4	287.87
290.2	289.57
290.8	290.46
292	291.67
292.3	291.88
292.9	292.7
293.2	293.2
293.7	293.67
293.9	293.93
294.2	294.32
294.3	294.44
294.7	294.94
294.9	295.09
295	295.42
295.2	295.49
295.4	295.67
295.9	296.26
296.1	296.44
283.5	285.11
285	286.5
287.6	288.45
289.2	290.23
290.1	291.04
291.1	291.87
291.9	292.64
292.2	292.98
292.8	293.49
293.2	293.76
293.9	294.42
294.4	294.81
295	295.36
295.3	295.6
