# Supplementary material for: A Graphical Alternating Conditional Expectation to Predict Hydrate Phase Equilibrium Conditions for Sweet and Sour Natural Gases
Source: Hindawi journal article supplement (doi:10.1155/2019/2383961), 2019-01-01
Supplement: f1 [file 2383961.f1.zip › 2383961.f1/Fig9 Global AARD of different correlations.xlsx]

## Sheet: Fig 9
Globle AARD%
0.133604
0.164483
0.370832
0.39928
0.491673
0.504402
0.757401
0.848276
1.11374
1.45608
1.64468
1.73536
2.07633
3.09264
