# Supplementary material for: A Graphical Alternating Conditional Expectation to Predict Hydrate Phase Equilibrium Conditions for Sweet and Sour Natural Gases
Source: Hindawi journal article supplement (doi:10.1155/2019/2383961), 2019-01-01
Supplement: f1 [file 2383961.f1.zip › 2383961.f1/Fig10 Comparison of the experimental P with ACE test data for CO2 -CH4 system.xlsx]

## Sheet: Fig 10
Pexp(kPa)	Ppre(kPa)
2600	2679.85
3500	3494.19
5000	4907.79
2600	2679.85
3500	3494.19
5000	4907.79
5460	5282.15
6890	7442.44
4990	4973.07
5100	5343.75
3830	3776.38
4910	4853.84
6800	6799.74
8400	8525.33
3950	3995.52
4850	4863.4
3100	3073.57
10760	10989.4
2520	2508.77
4750	4804.08
9240	9371.05
9240	9371.05
3200	3145.27
3240	3288.75
4180	4125.92
5380	5432.35
7170	7191.31
10950	10979
2590	2610.17
4580	4654.24
4630	4646.41
4570	4642.51
4500	4547.23
4440	4510.29
4370	4495.7
2600	2681.89
2600	2681.89
5000	5070.91
5000	5070.91
3500	3473.53
3500	3473.53
4340	4424.29
4370	4424.29
7750	7883.93
4310	4382.65
4320	4375.8
3960	3949.49
6230	6272.47
6470	7311.05
4220	4295.46
4200	4282.4
2120	2174.28
10440	10494.2
2000	2099.24
2000	2099.24
4150	4209.12
5170	5670.12
4060	4147.84
4070	4132.86
3460	3510.65
3980	4106.24
4000	4082.95
4010	4080.06
4240	4347.61
2000	2118.33
2840	2768.94
3860	3952.77
3430	3359.37
3770	3882.94
5430	5435.47
6940	7019.62
9780	9537.3
2600	2583.28
4030	4029.75
4140	4127.1
1500	1694.04
5000	5027.35
4470	4574.39
6890	7325.67
7000	7522.02
2630	2579.07
3500	3345.96
3710	3774.12
1810	1821.89
6840	6851.63
3080	3294.08
3670	3730.88
3640	3726.43
9590	9302.85
1780	1750.39
1830	1876.65
2050	2074.68
2980	2980.89
2120	2163.4
2200	2182.1
2400	2445.76
2825	2917.06
3600	3644.89
2851	3001.64
1990	2117.84
3301	3289.13
3370	3526.12
4410	4344.56
5001	5054.58
5070	5095.2
5270	5570.81
2000	2085.76
2000	2085.76
3380	3462.64
5000	5021.98
5000	5021.98
1990	1960.82
3500	3364.49
4270	4353.29
1500	1576.18
2600	2565.22
2600	2565.22
4120	4142.58
4120	4142.58
2580	2560.02
3280	3275.26
3240	3312.72
2080	2049.73
2080	2049.73
3000	2999.86
1660	1645.15
3790	3835.54
2970	2952.65
2370	2352.37
3500	3411.75
1880	1859.36
2600	2464.17
1450	1442.11
2000	1995.65
5000	4909.68
4370	4317.94
4370	4317.94
1500	1471.72
1093.17	1298.9
1155.28	1312.87
1192.55	1329.41
1950.31	2031.24
1937.89	2137.81
2043.48	2224.29
2993.79	3091.22
3726.71	3695.2
4801.24	4020.53
1500	1488.24
2000	2001.4
2600	2595.02
3500	3546.58
1500	1488.24
2000	2001.4
2600	2595.02
3500	3546.58
3040	3024.21
1234	1268.17
1241	1282.92
1324	1313.07
1317	1344.1
1351	1376.04
1386	1425.71
1510	1531.79
1613	1607.85
1634	1667.89
1682	1730.65
1717	1774.06
1848	1841.64
1889	1936.58
1951	2011.59
2087	2117.02
2137	2172.16
2165	2229
2344	2410.23
2448	2474.41
2530	2574.45
2544	2608.83
2730	2826.62
2861	2943.33
2923	2983.45
3020	3107.64
3158	3237.78
3282	3374.18
3475	3566.35
3689	3771.03
3689	3824.26
3868	3989.11
4468	4469.31
4502	4533.78
5290	6722.31
9830	9877.95
11620	12923.1
3600	3667.11
5820	6438.93
12410	13061.5
5880	6497.14
2960	3130.32
3160	3379.39
4020	4003.42
13060	11053.5
4030	3951.15
5480	5362.9
8270	8208.25
2720	2773
3610	3457.12
6090	6652.51
2720	2744.94
3210	3153.38
4700	4744.98
