# Supplementary material for: A Graphical Alternating Conditional Expectation to Predict Hydrate Phase Equilibrium Conditions for Sweet and Sour Natural Gases
Source: Hindawi journal article supplement (doi:10.1155/2019/2383961), 2019-01-01
Supplement: f1 [file 2383961.f1.zip › 2383961.f1/Fig11 Comparison of the experimental P with calculated test data by ACE model for H2S-CO2-CH4 system.xlsx]

## Sheet: Fig 11
Pexp(kPa)	Ppre(kPa)
1044	1216
1580	1602
2352	2246
3126	2900
3964	3736
5121	4741
6358	6021
7212	6899
8220	8105
1114	1127
1385	1368
1815	1677
2265	2129
3110	2780
4065	3632
4570	4126
4890	4666
6110	5269
6862	5979
7650	6584
8024	6883
1192	1189
1932	1809
2460	2342
3303	3090
4212	4038
4930	4875
5868	5897
6630	6795
7916	8039
646	657
1020	990
1428	1391
2080	1997
3164	3087
4070	4095
5270	5330
6698	6585
7910	7806
950	1049
1244	1322
1670	1664
2368	2184
3080	2951
4008	3954
5314	5183
6310	5949
6880	6506
7825	7440
8680	8356
582	709
786	779
1160	1206
1788	1752
2688	2782
3910	3807
5030	4732
6562	5864
8080	7546
1675.86	1621
2275.86	2101
3868.97	3859
4558.62	4460
5889.65	5767
6882.76	6929
8655.17	8849
9634.48	10309
1903.45	2583
2765.52	3054
4255.17	4634
4979.31	5430
5944.83	6821
6986.21	8940
1475.86	1486
2034.48	2079
2772.41	2657
3744.83	3683
4931.03	4770
6186.21	5779
7551.72	6569
11227.6	9314
3331.03	3782
4393.1	4851
5124.14	5806
6496.55	6102
7386.21	7247
8406.9	10280
8006.9	8810
1241.38	1274
1751.72	1684
2482.76	2373
3620.69	3452
5275.86	4895
758.621	625
965.517	874
1275.86	1240
1724.14	1701
2379.31	2508
1034.48	1203
1434.48	1586
2000	2214
2827.59	3233
4000	4625
1172.41	1372
1655.17	1829
2413.79	2601
3517.24	3755
5241.38	5273
1450	1477
1710	1610
880	776
1220	1140
1660	1571
920	1005
1060	1171
1620	1768
1560	1862
1940	2417
